# Supplementary material
Source: ML conference proceedings conference paper supplement (https://openreview.net/forum?id=TNAGFUcSP7)

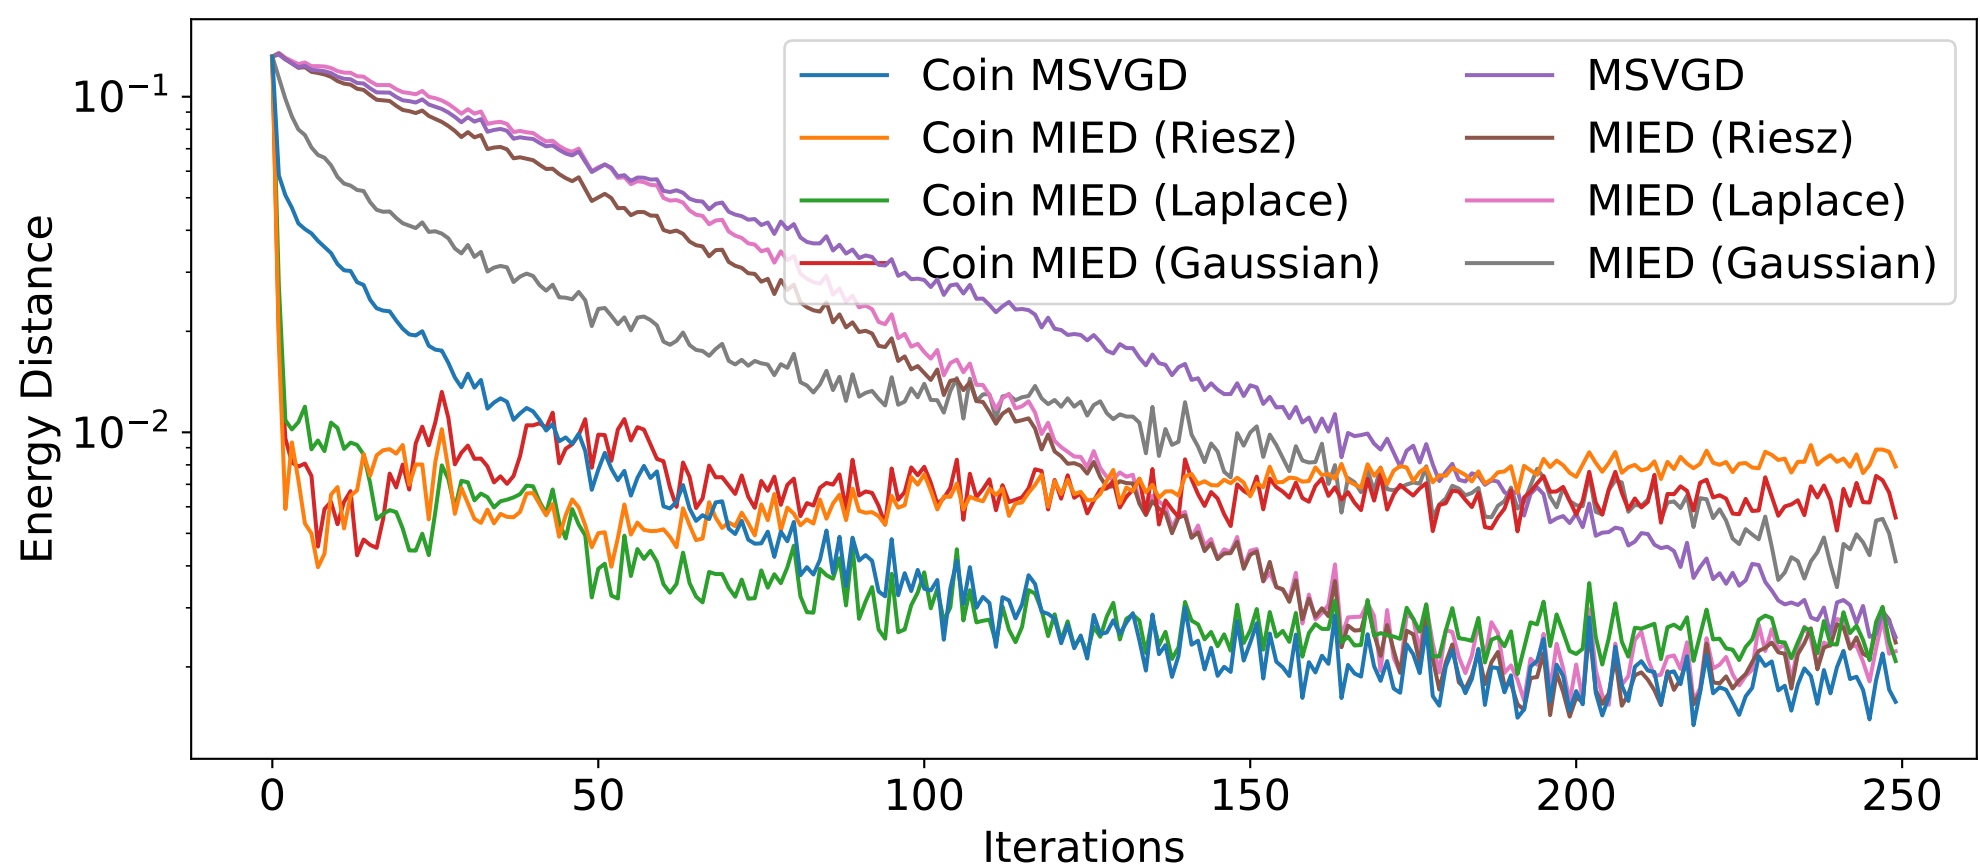

Supplement: supplementary_material [file attachment]

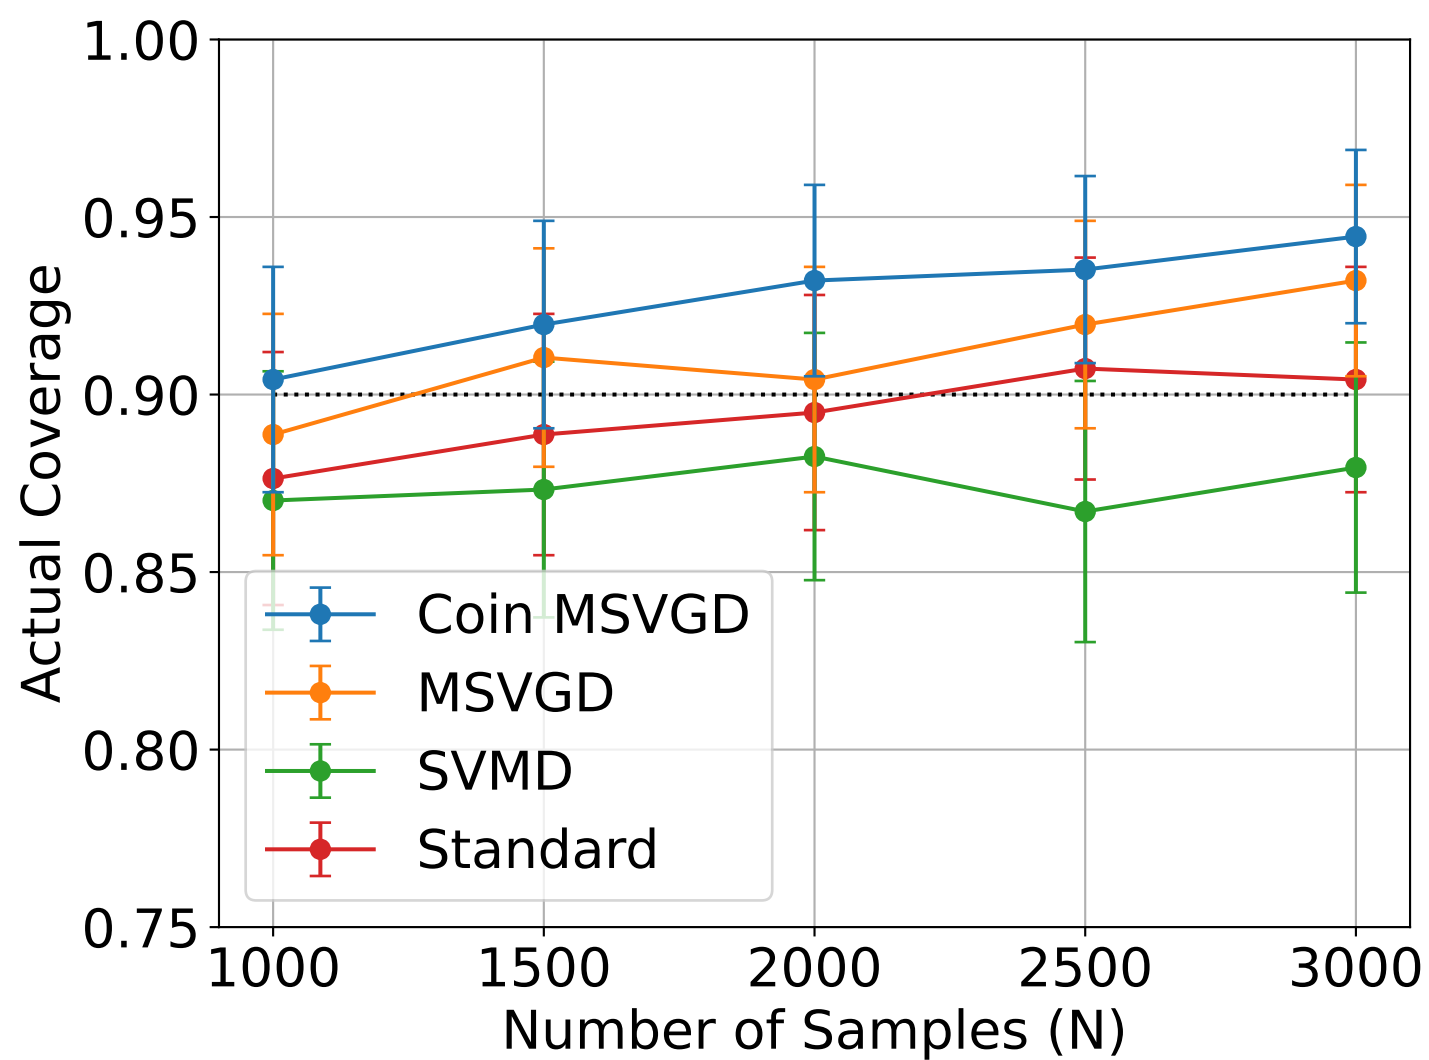

Supplement: supplementary_material [file attachment]

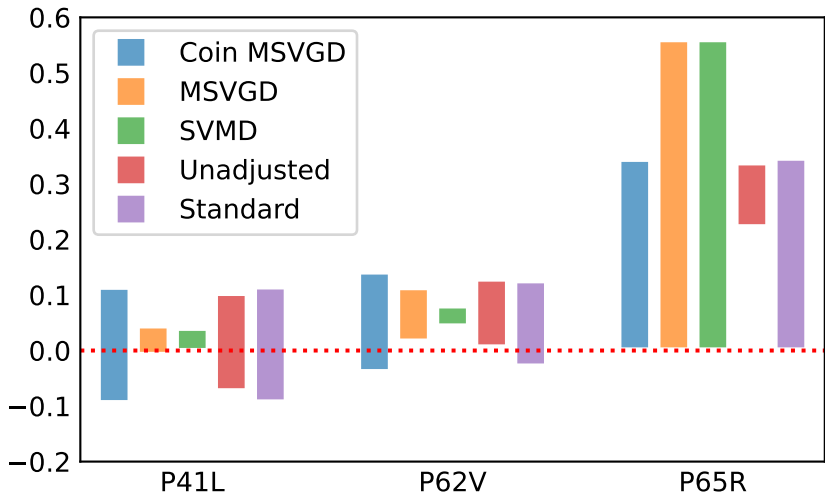

Supplement: supplementary_material [file attachment]

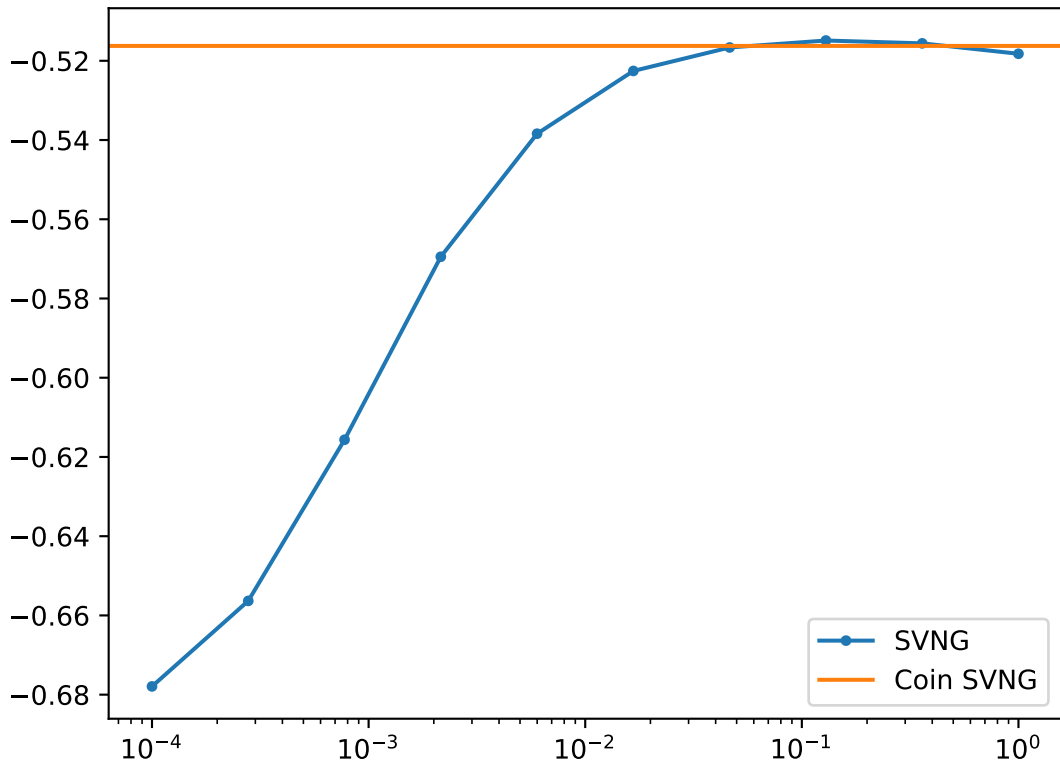

Supplement: supplementary_material [file attachment]

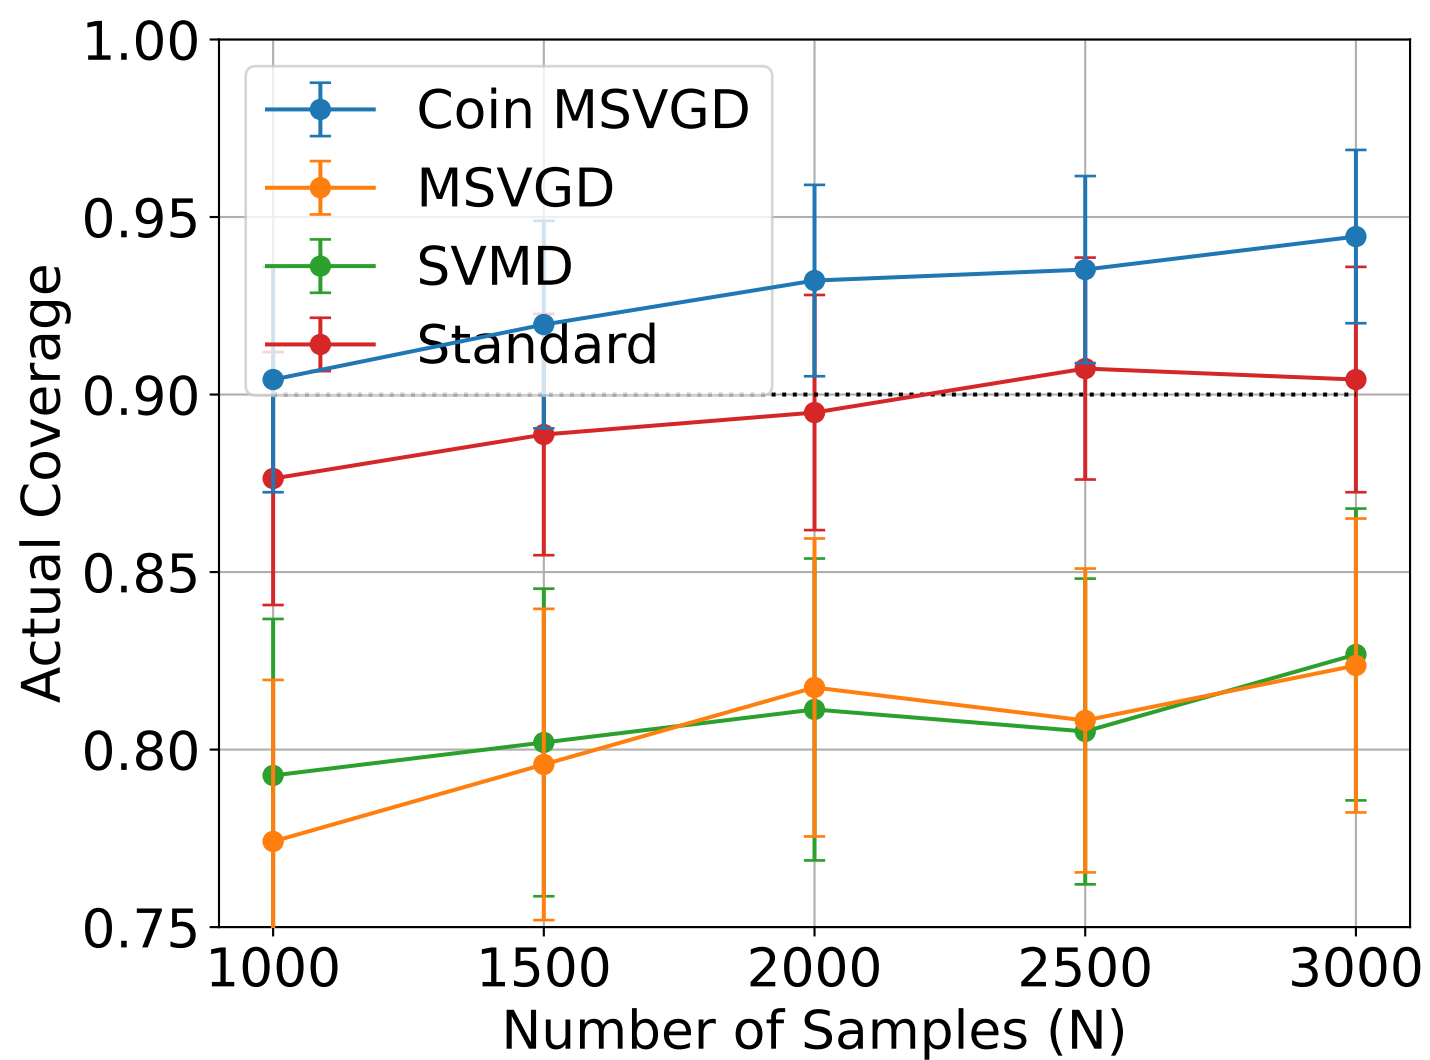

Supplement: supplementary_material [file attachment]

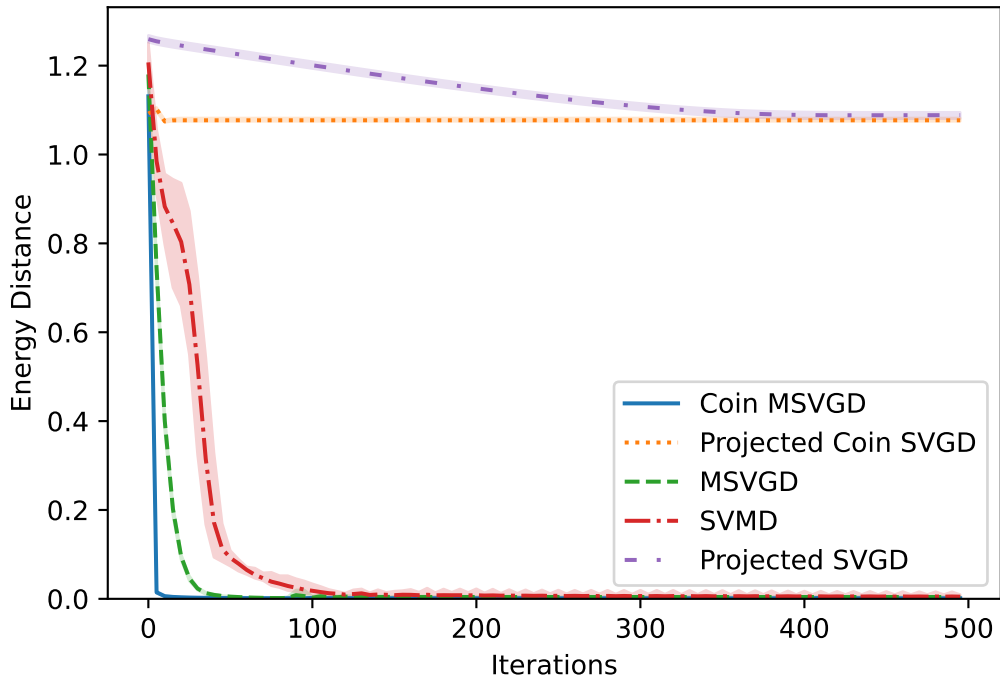

Supplement: supplementary_material [file attachment]

Coin Matrix SVGD (Avg)

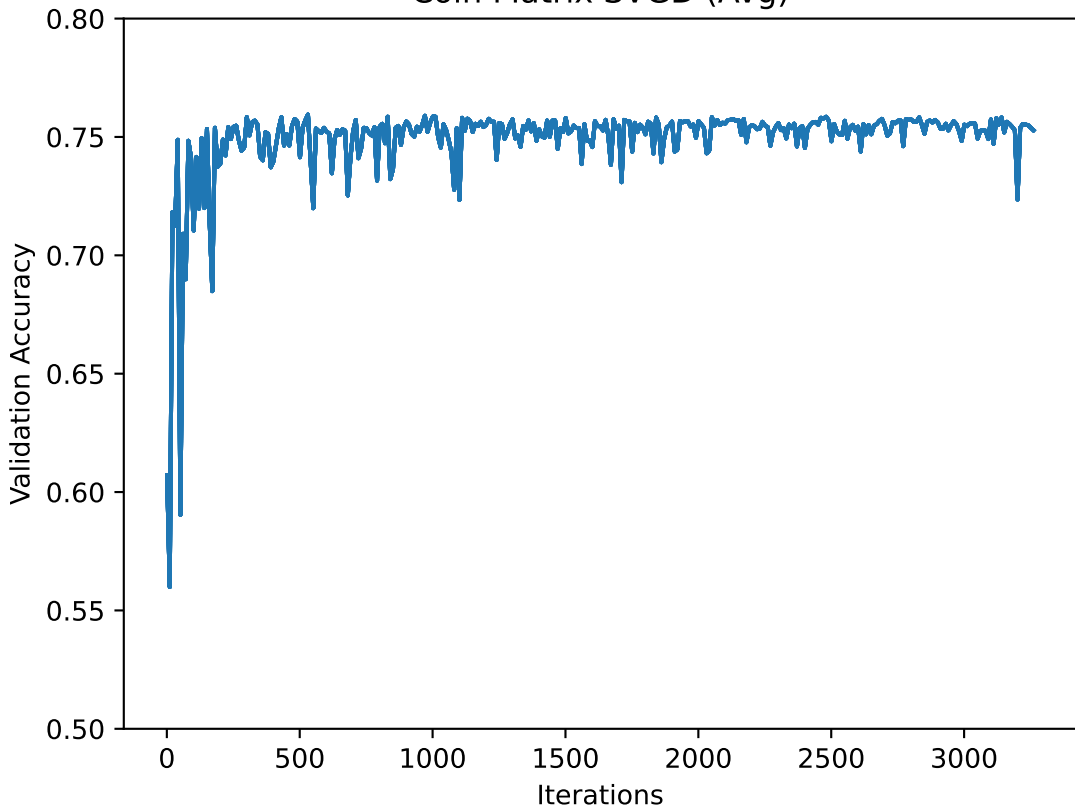

Supplement: supplementary_material [file attachment]

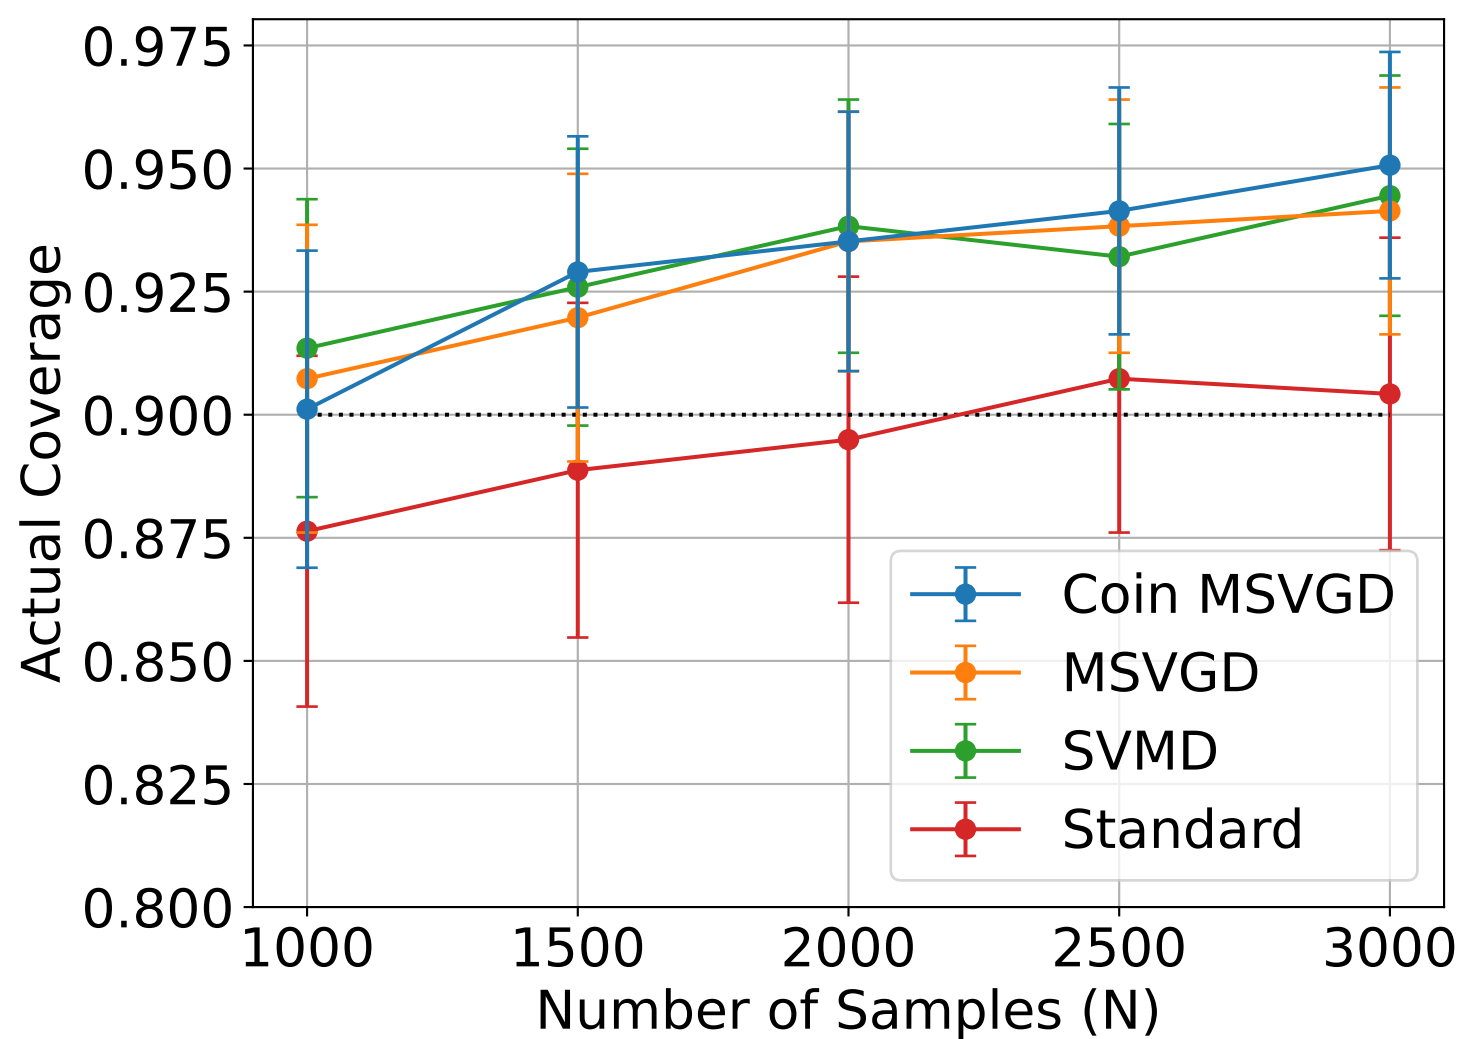

Supplement: supplementary_material [file attachment]

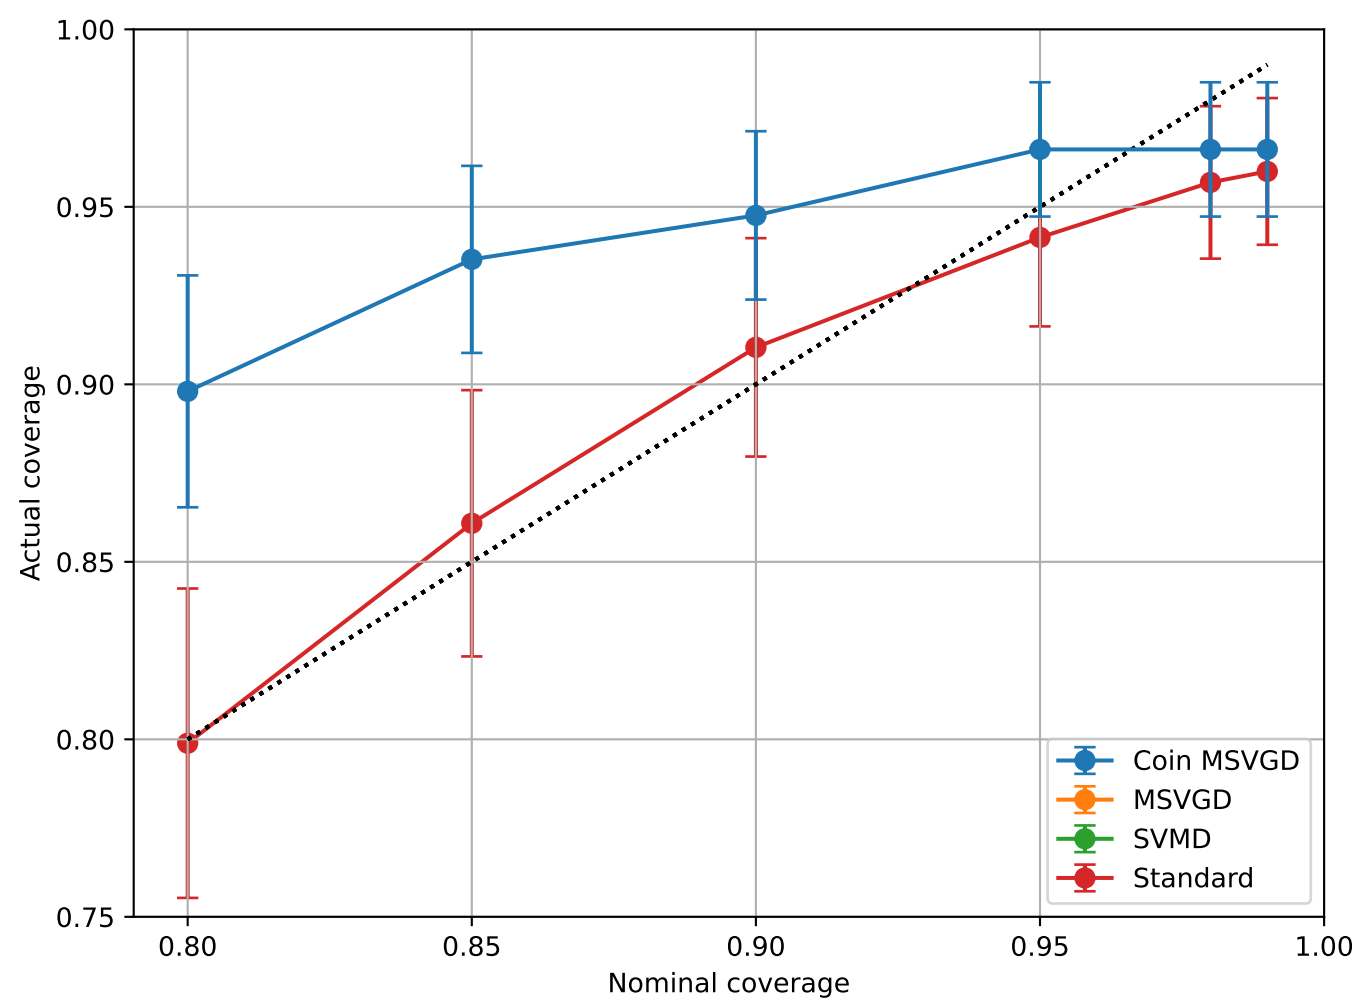

Supplement: supplementary_material [file attachment]

Coin RSVG

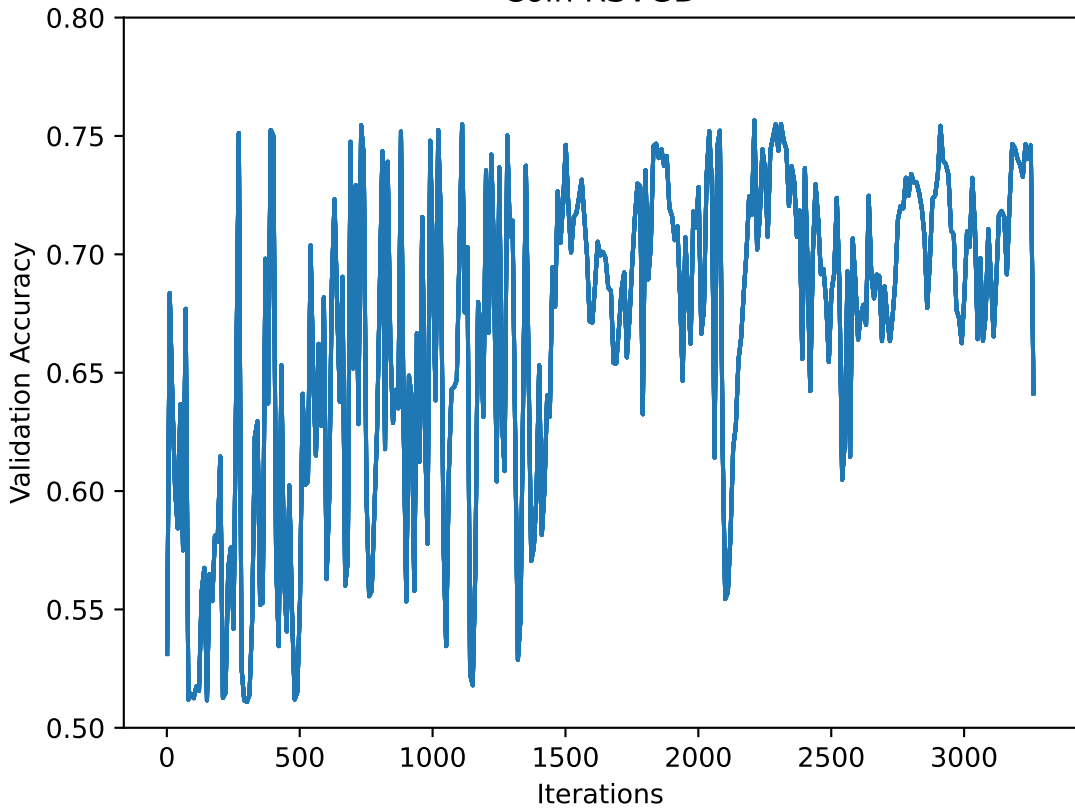

Supplement: supplementary_material [file attachment]

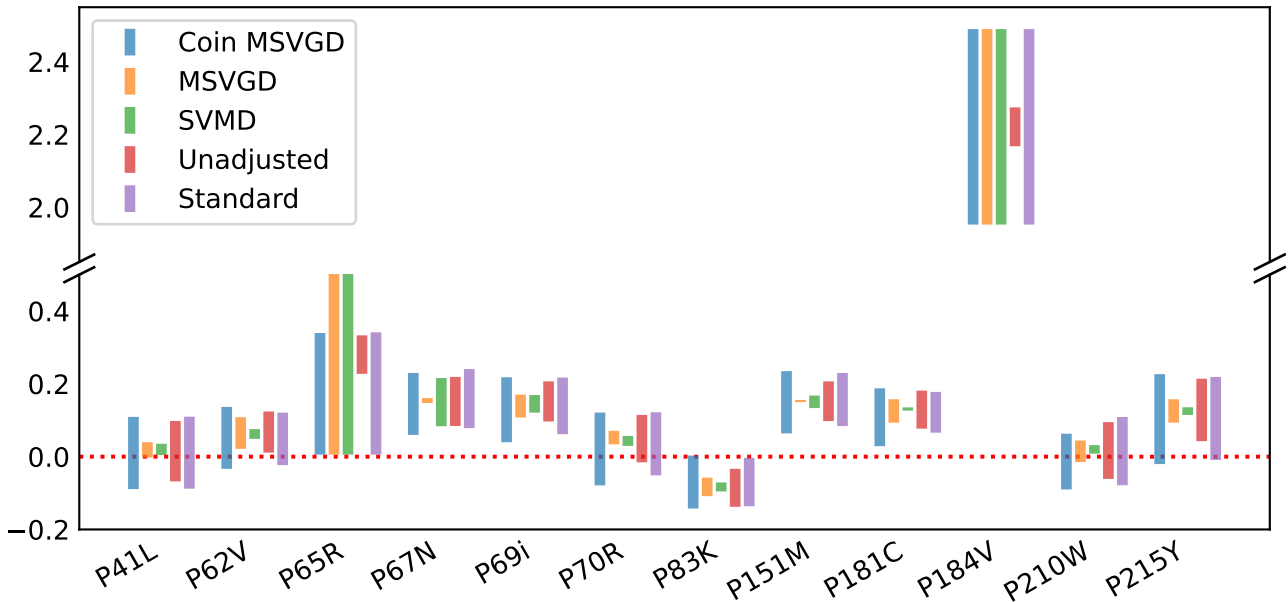

Supplement: supplementary_material [file attachment]

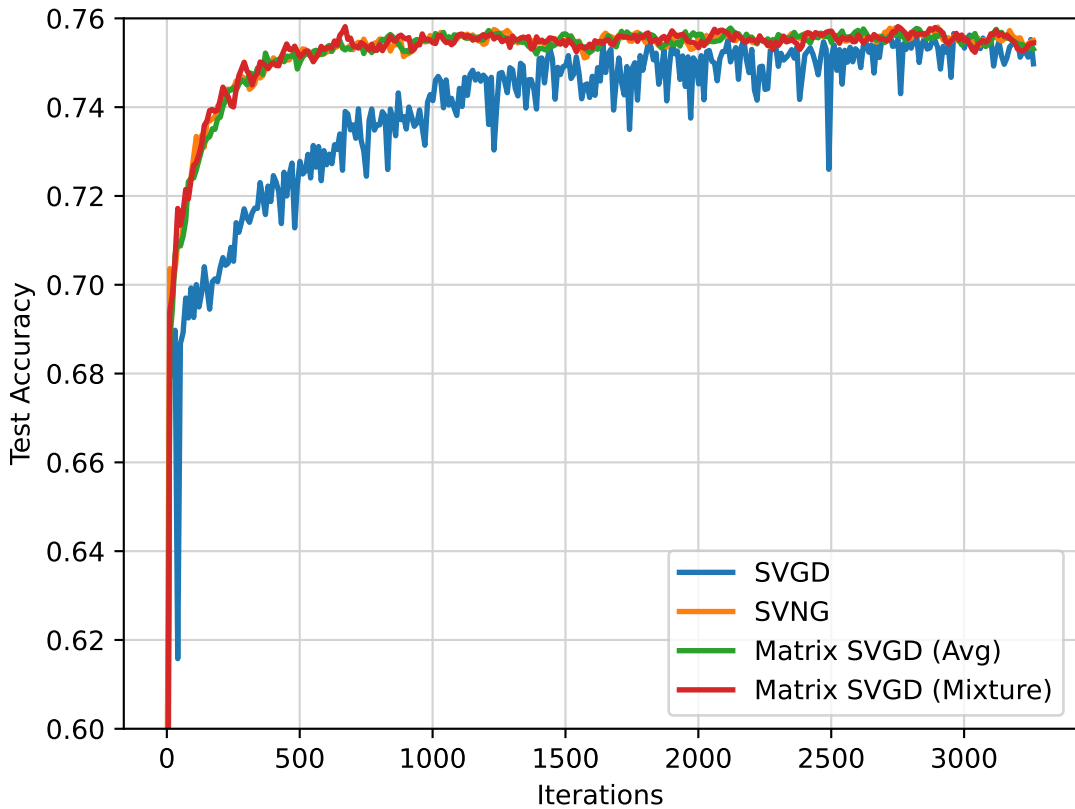

Supplement: supplementary_material [file attachment]

Coin RSVG

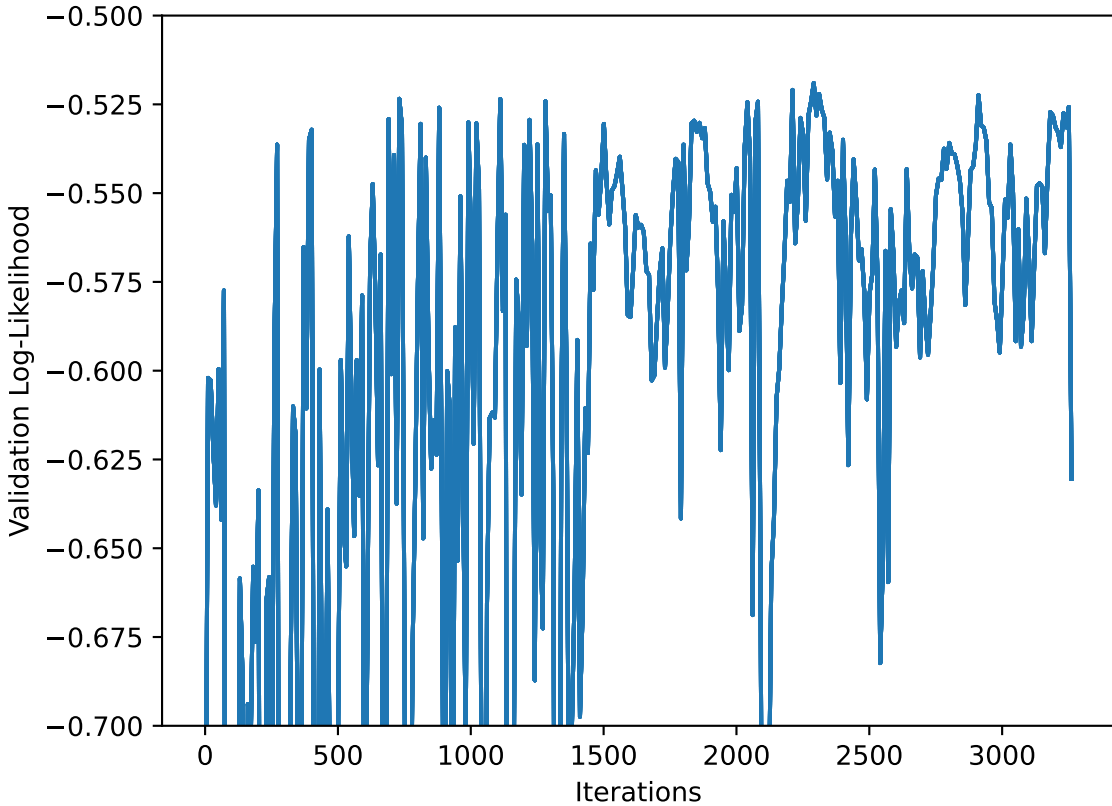

Supplement: supplementary_material [file attachment]

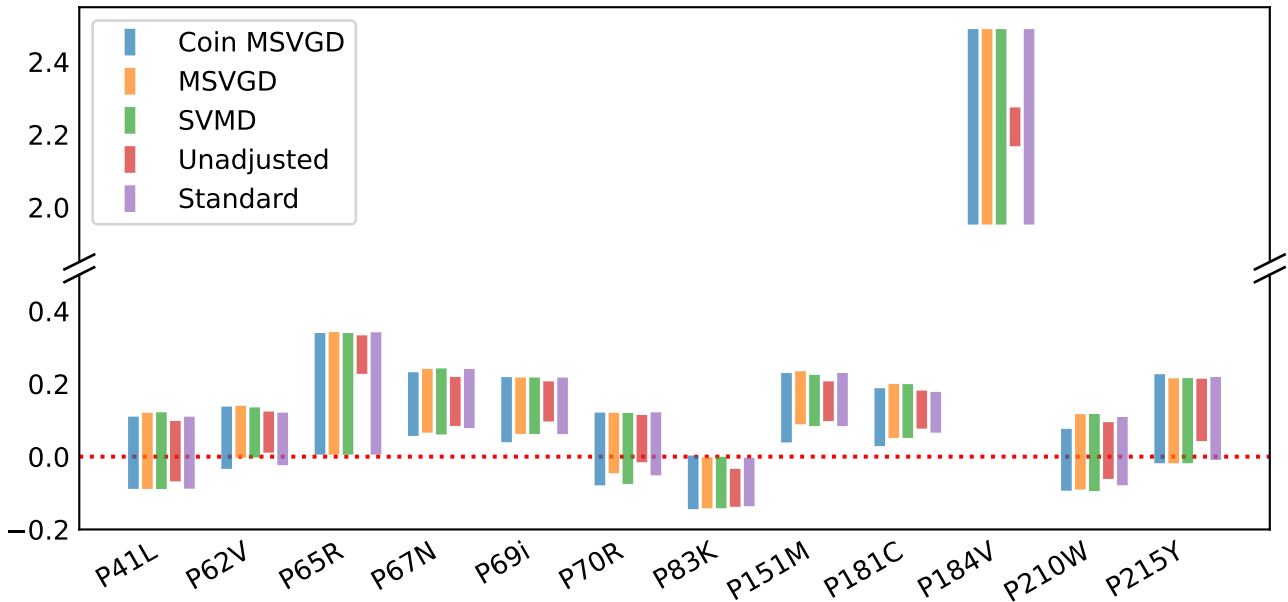

Supplement: supplementary_material [file attachment]

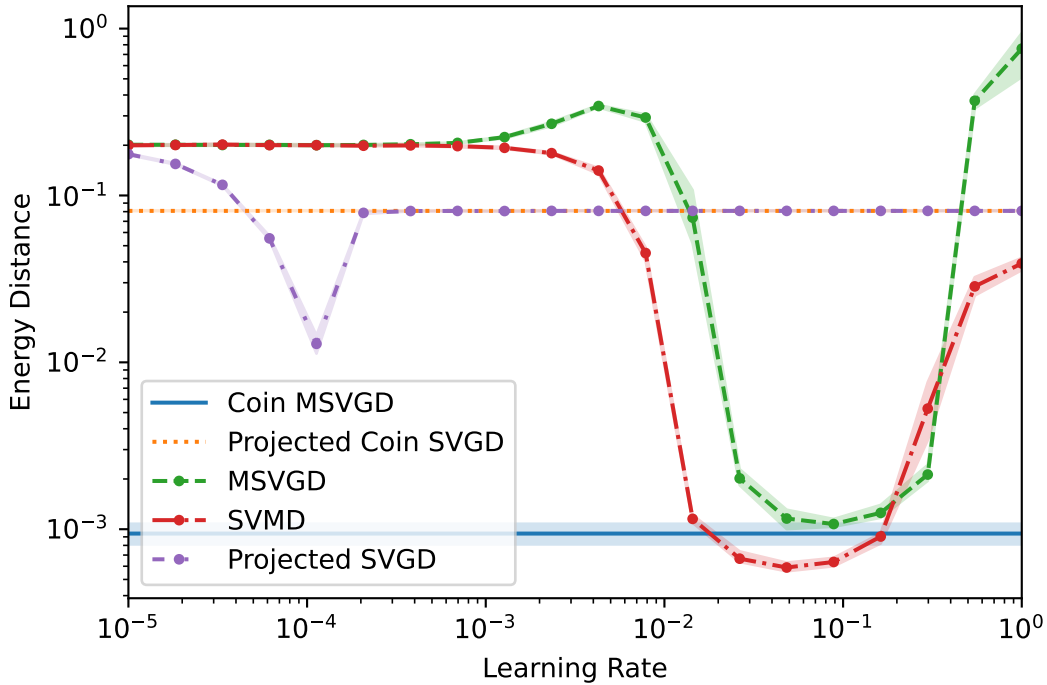

Supplement: supplementary_material [file attachment]

Projected SVGD

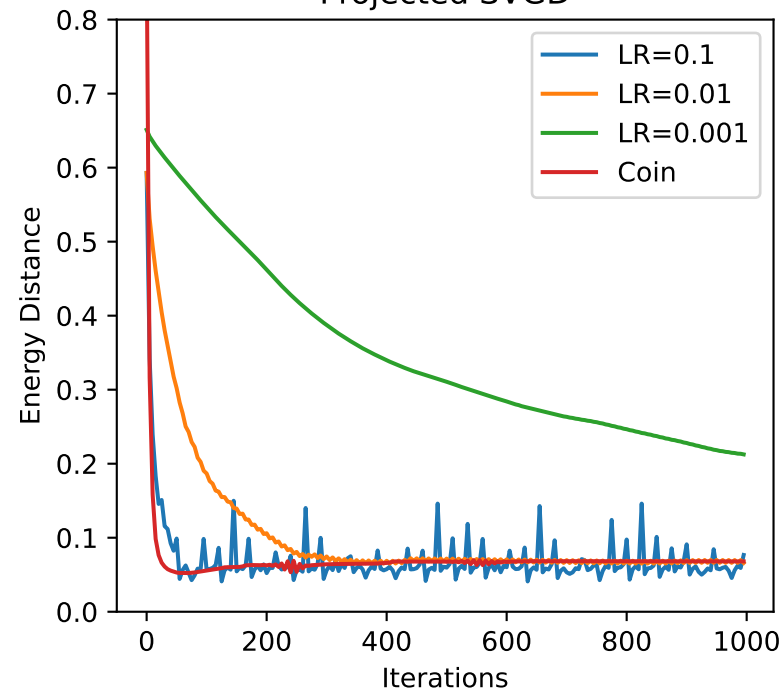

SVMD

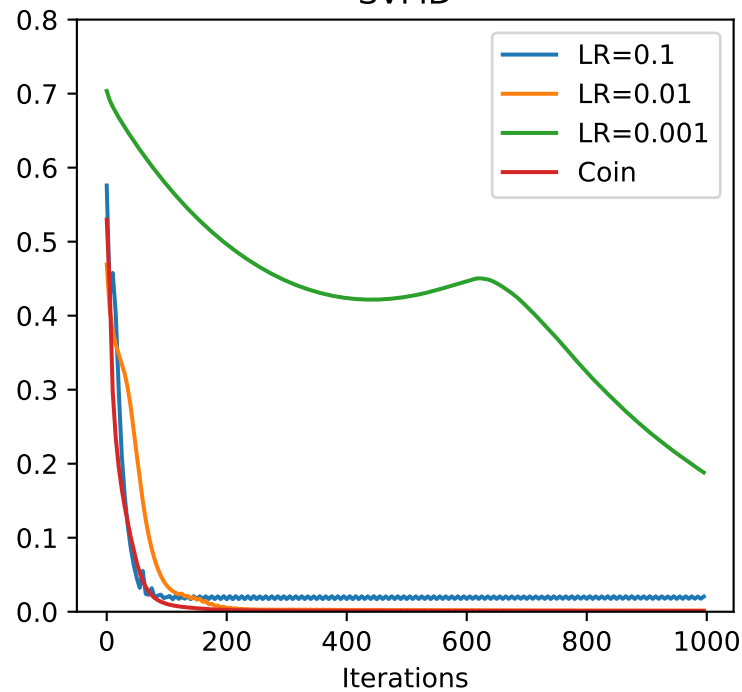

MSVGD

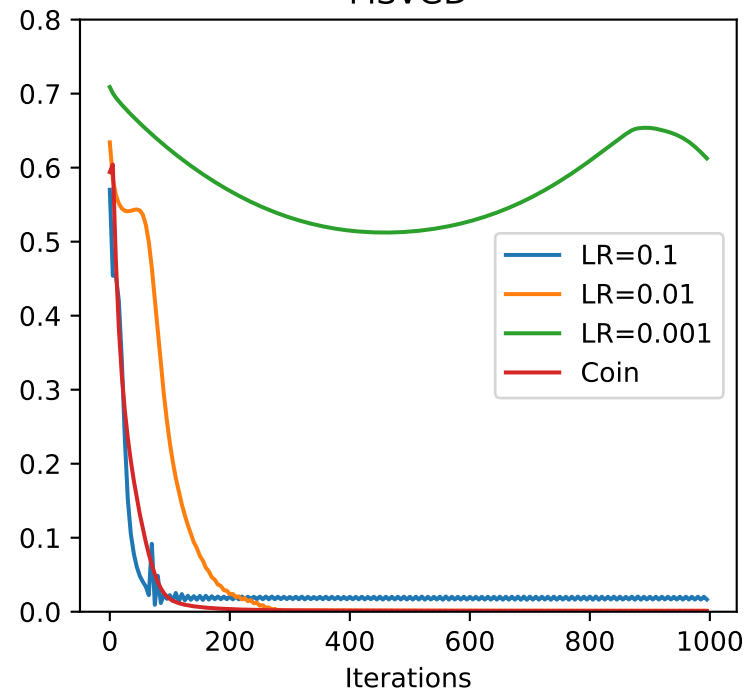

Supplement: supplementary_material [file attachment]

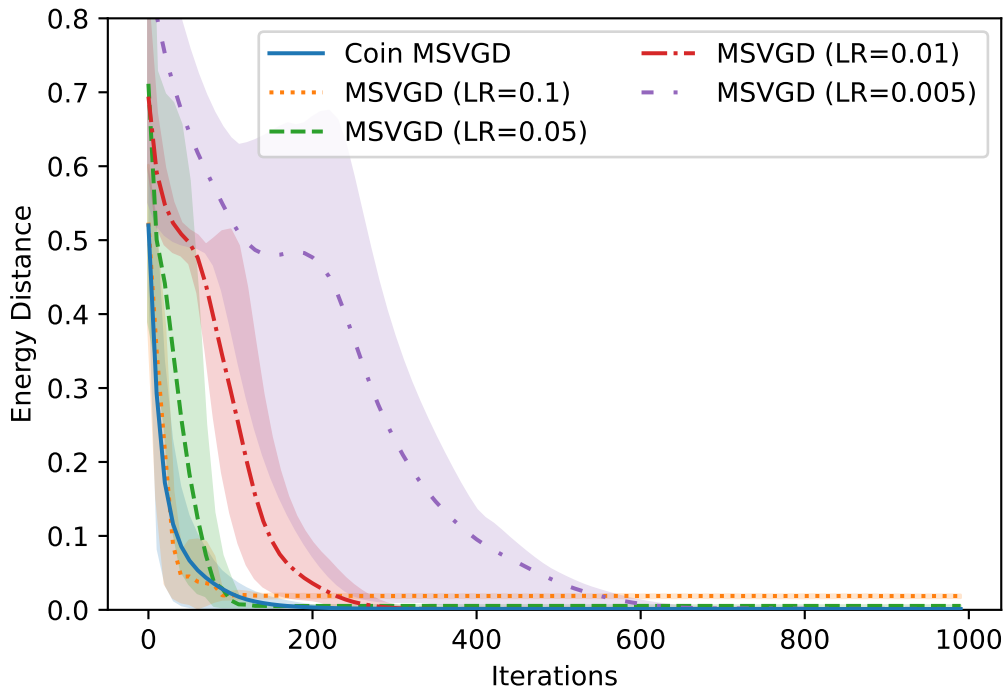

Supplement: supplementary_material [file attachment]

Coin Matrix SVGD (Avg)

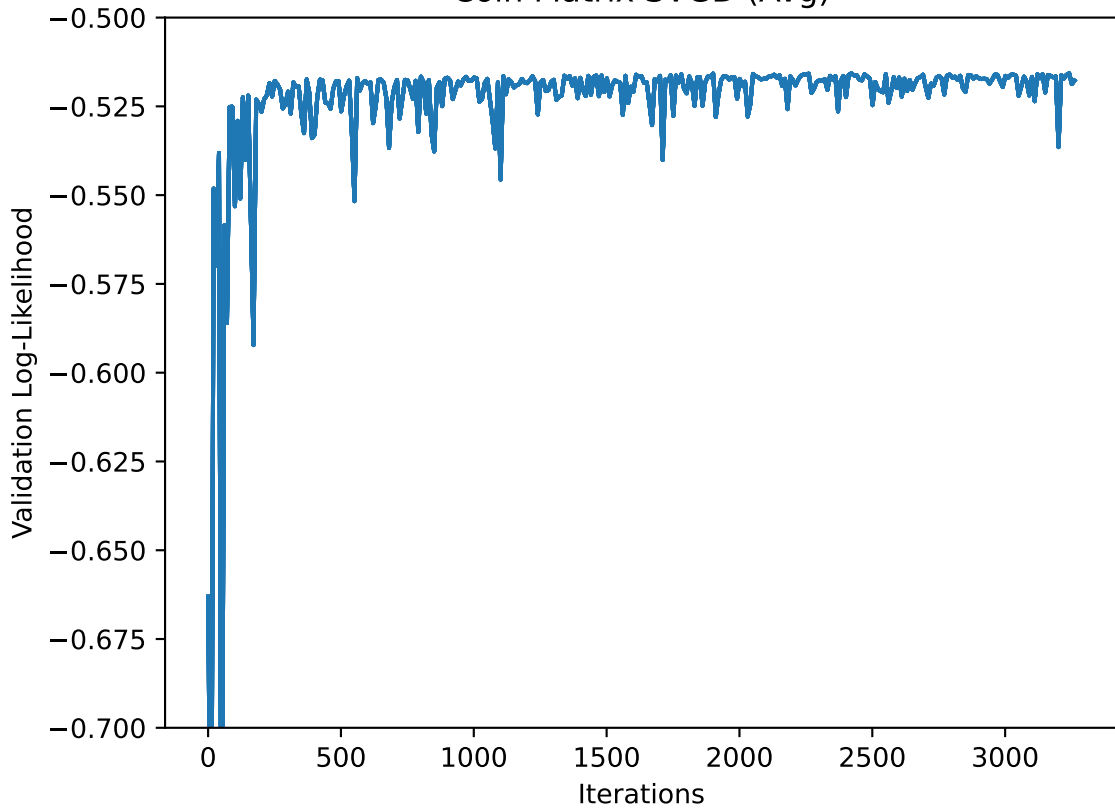

Supplement: supplementary_material [file attachment]

## SVNG

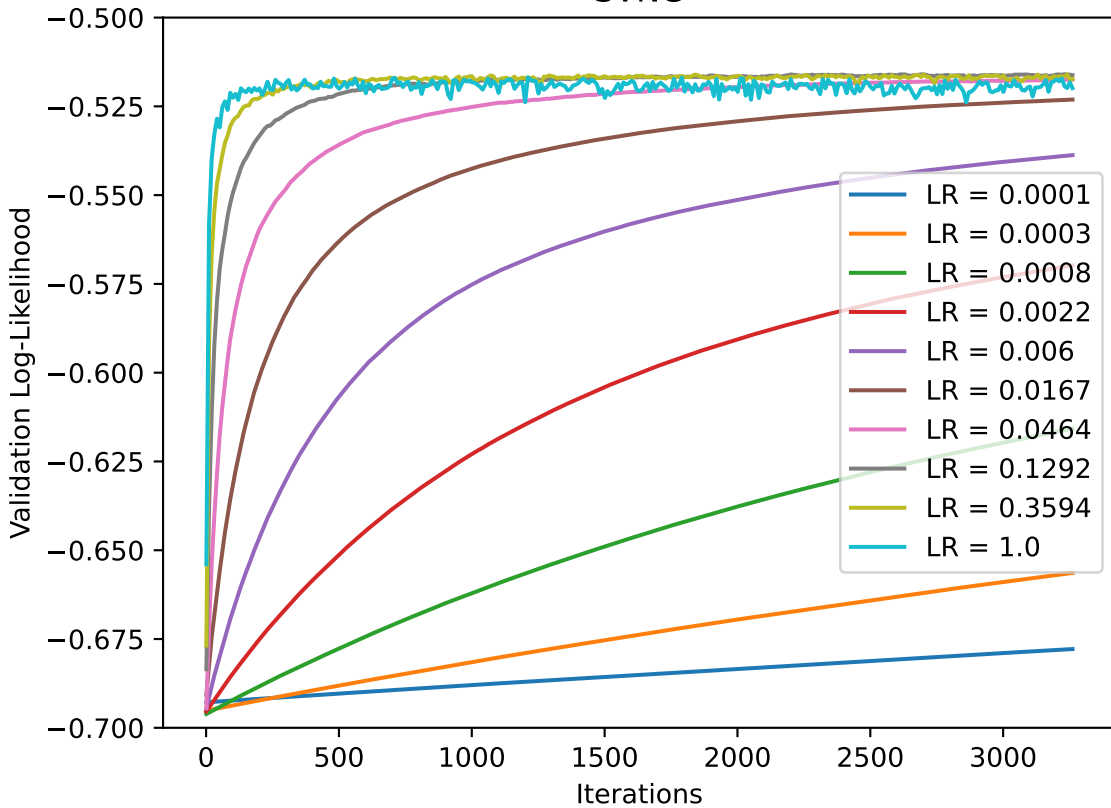

Supplement: supplementary_material [file attachment]

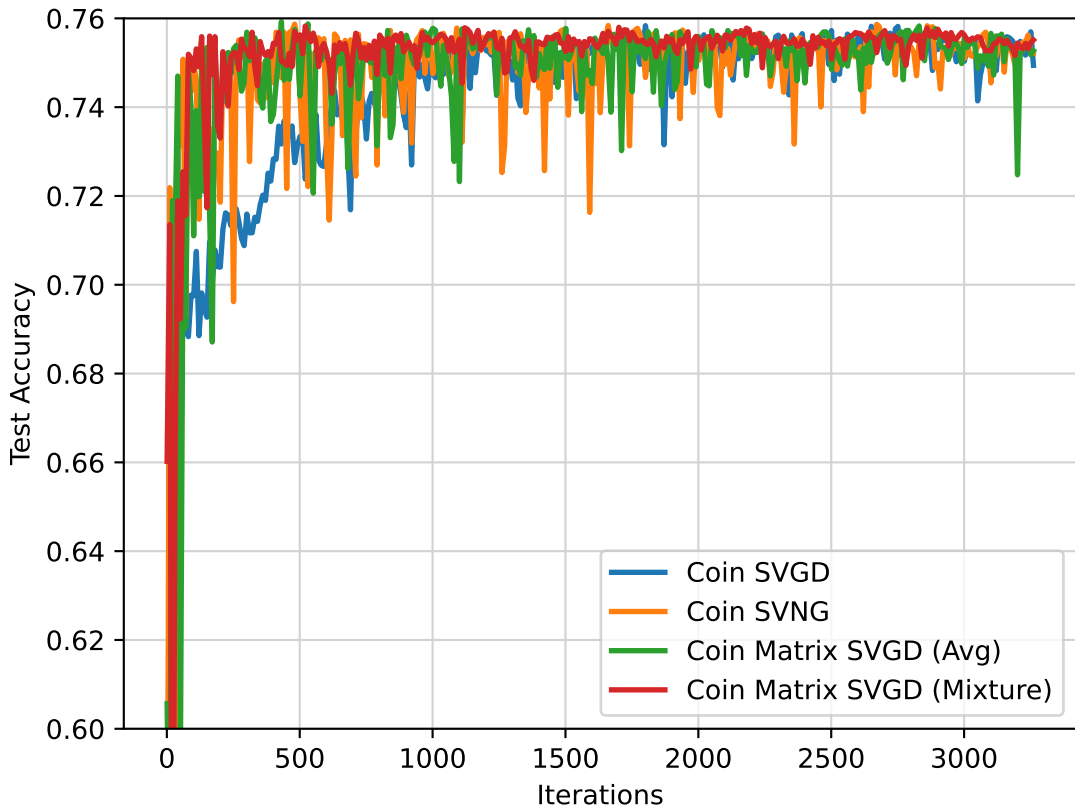

Supplement: supplementary_material [file attachment]

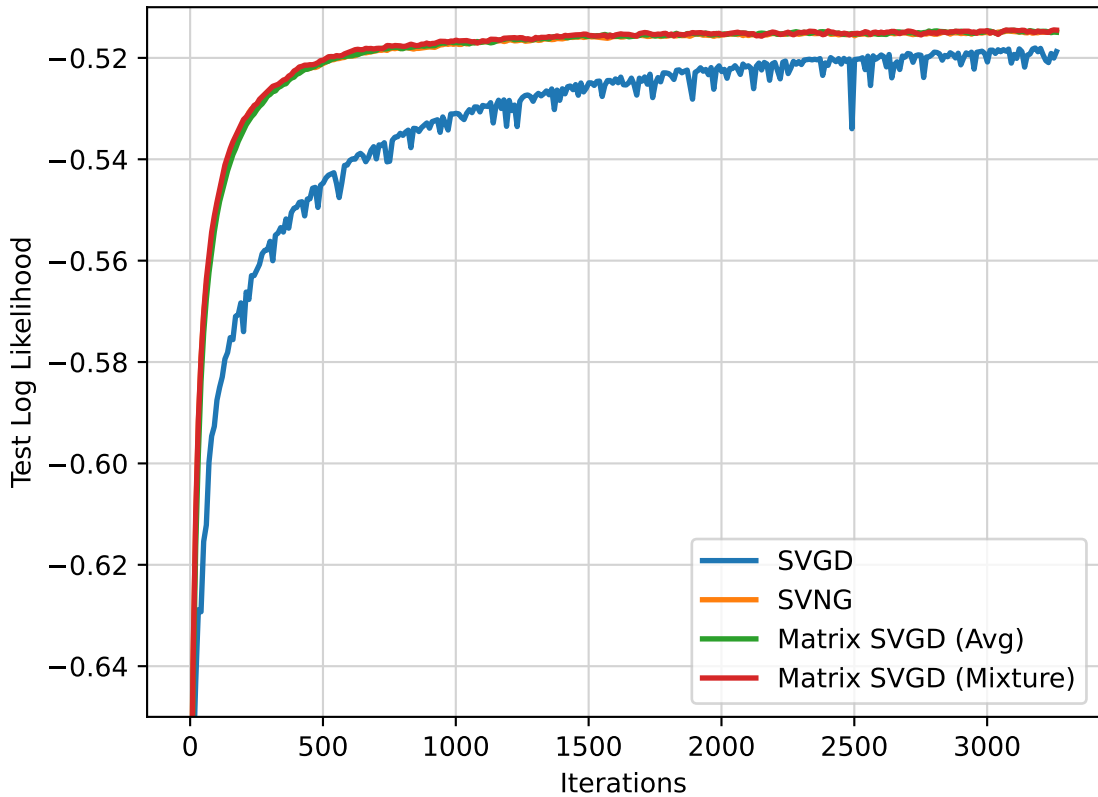

Supplement: supplementary_material [file attachment]

Coin Matrix SVGD (Mixture)

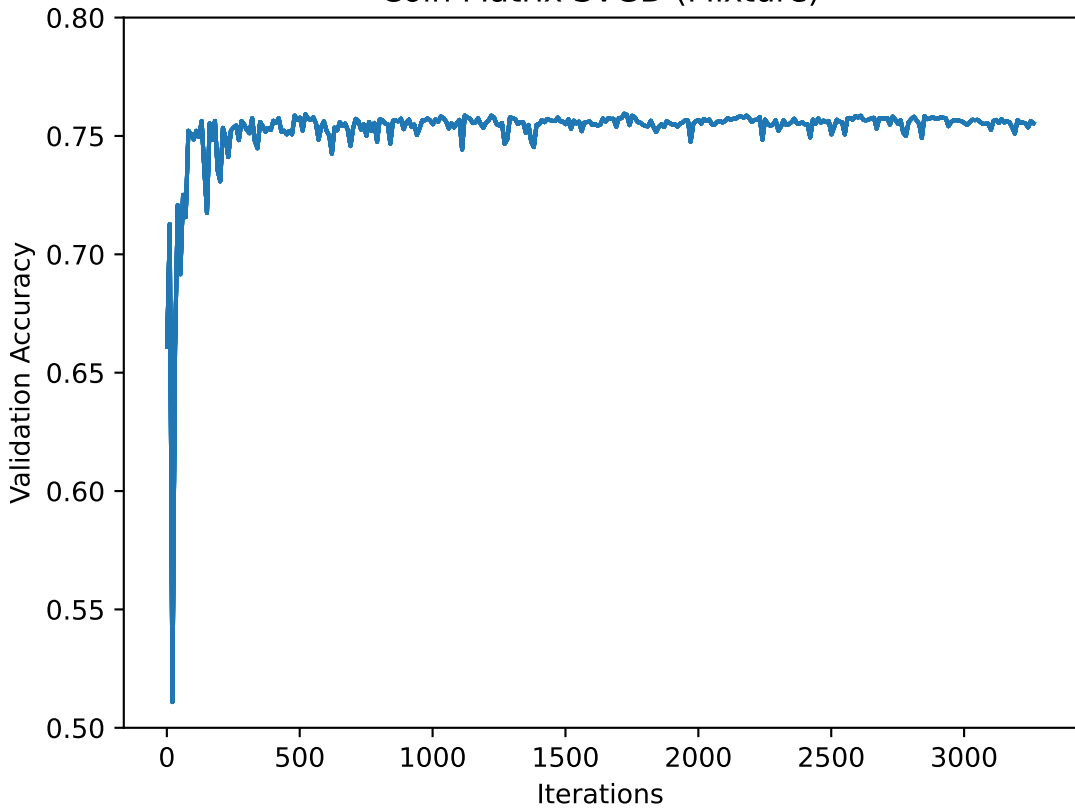

Supplement: supplementary_material [file attachment]

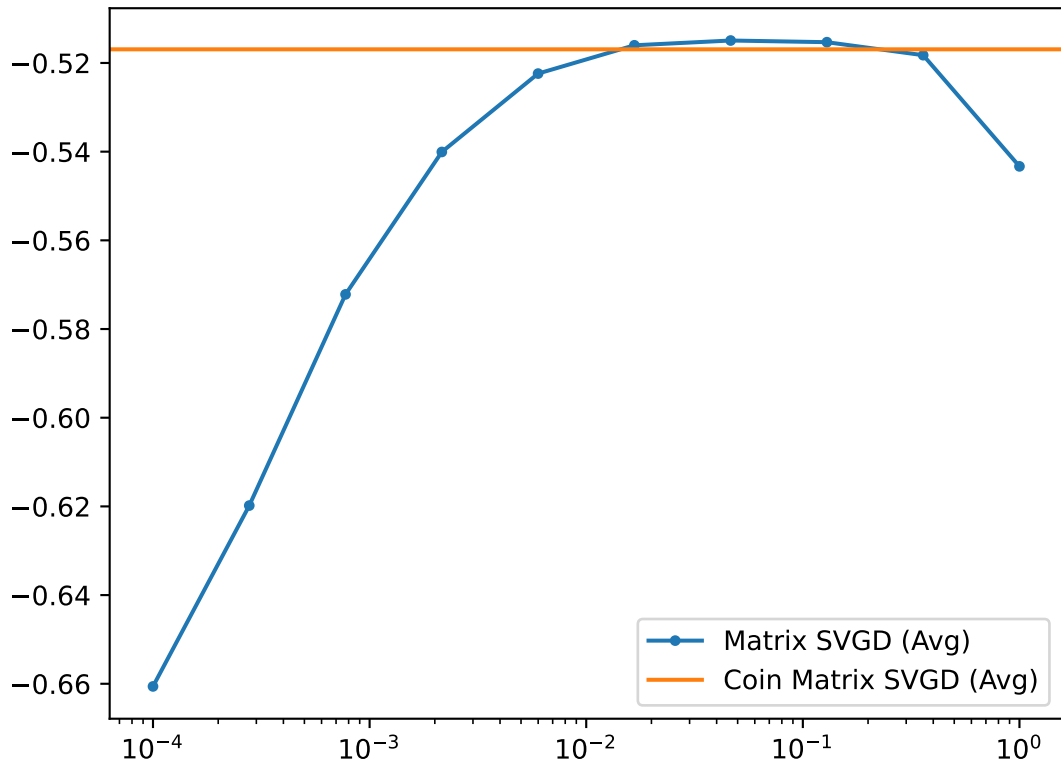

Supplement: supplementary_material [file attachment]

Coin Matrix SVGD (Mixture)

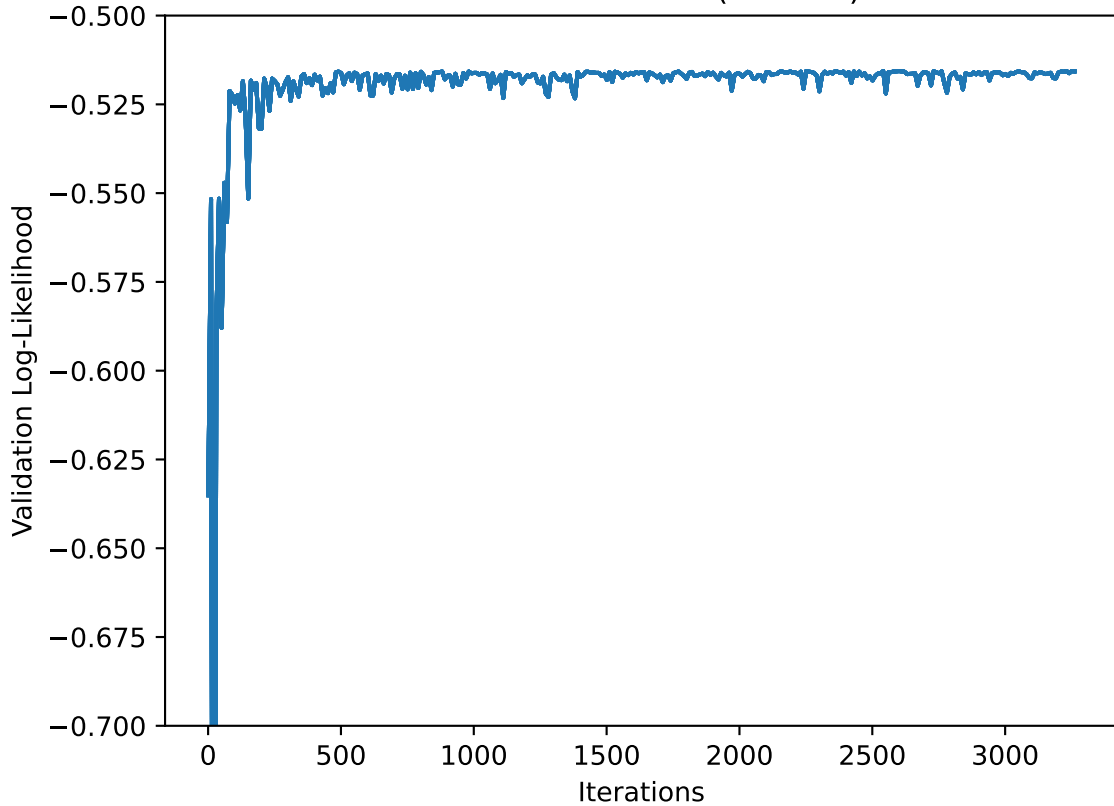

Supplement: supplementary_material [file attachment]

# RSVGD

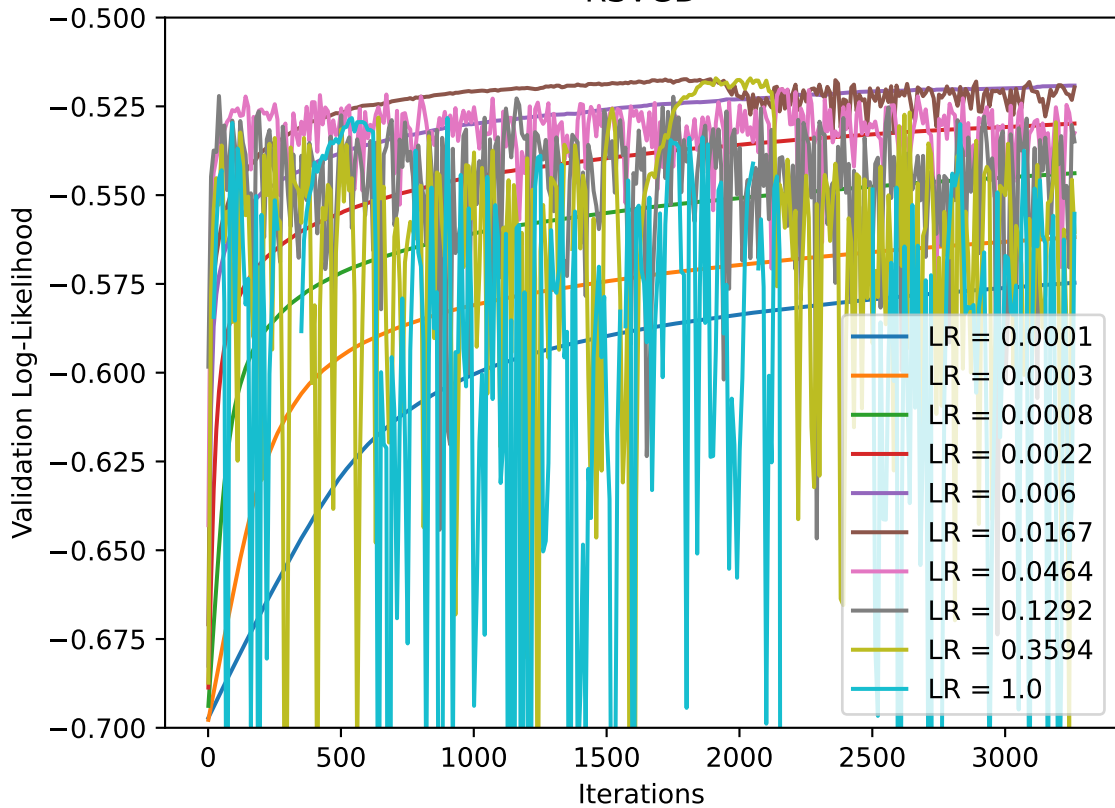

Supplement: supplementary_material [file attachment]



Supplement: supplementary_material [file attachment]

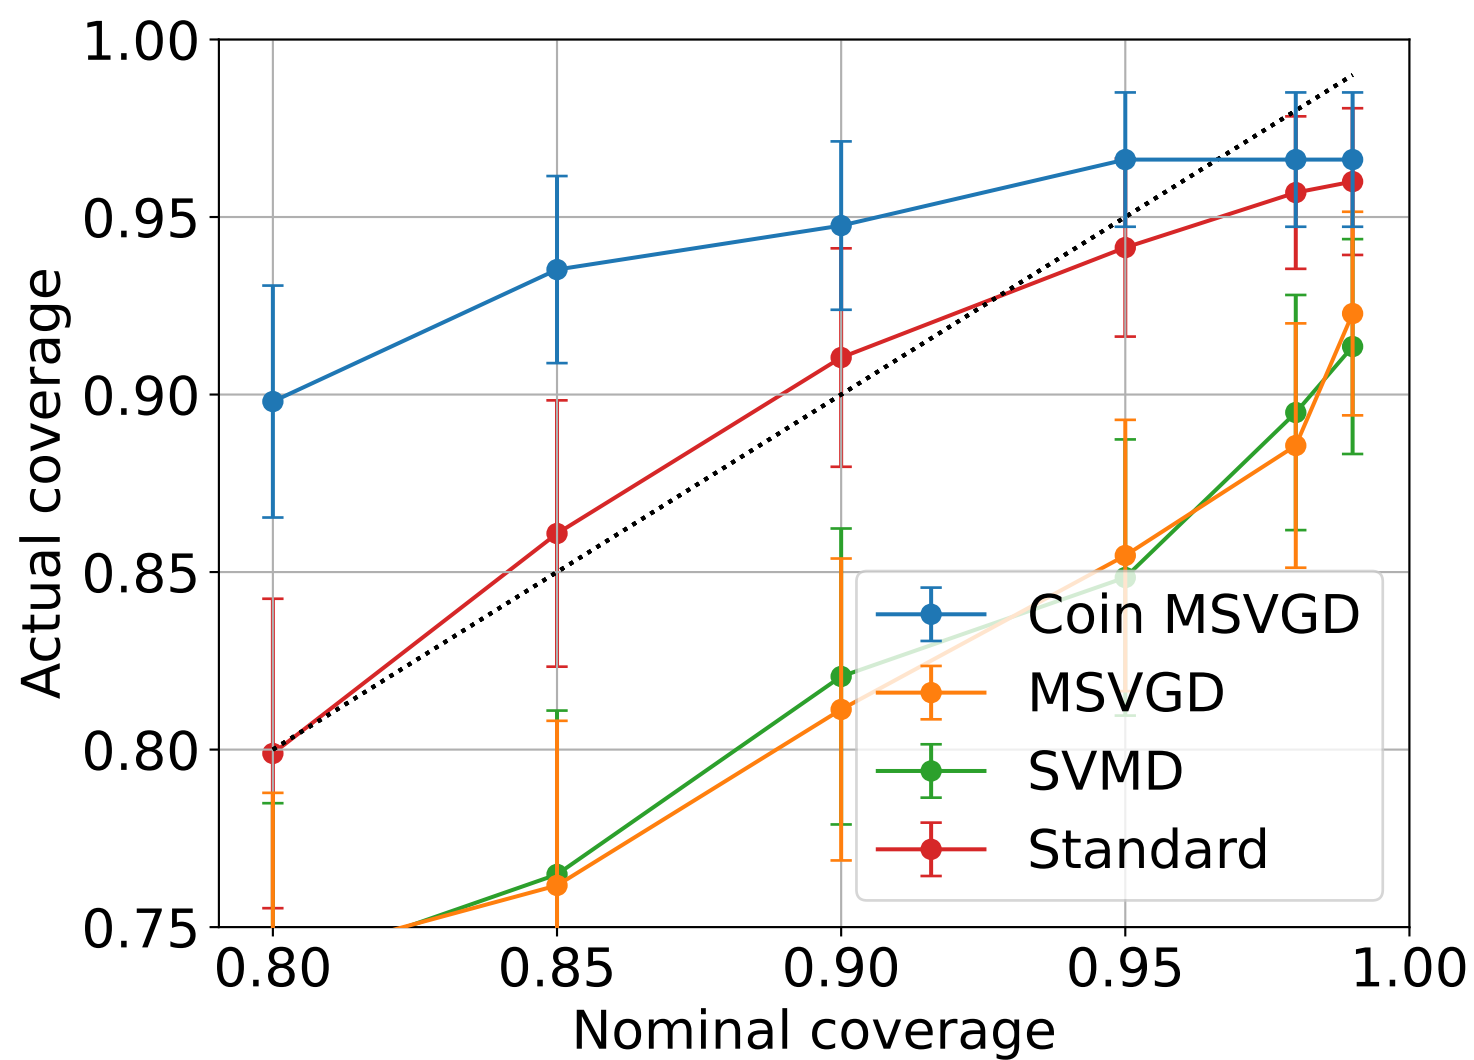

Supplement: supplementary_material [file attachment]

Coin SVNG

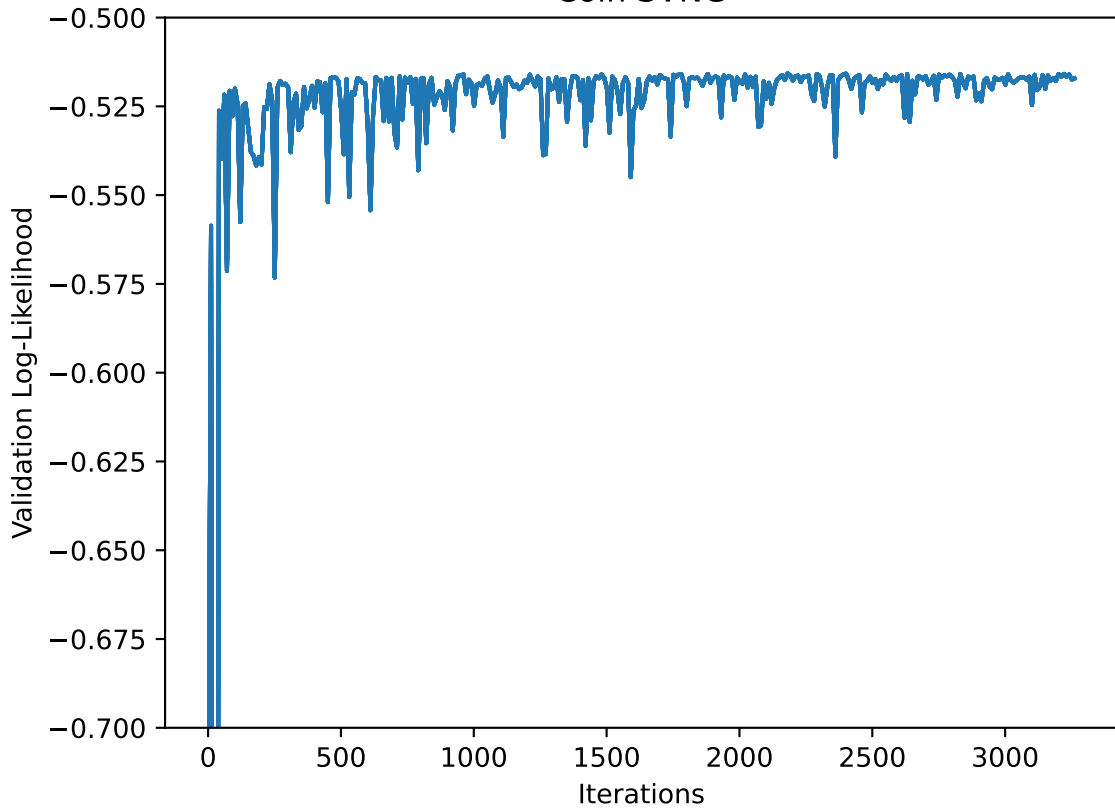

Supplement: supplementary_material [file attachment]

Constraint

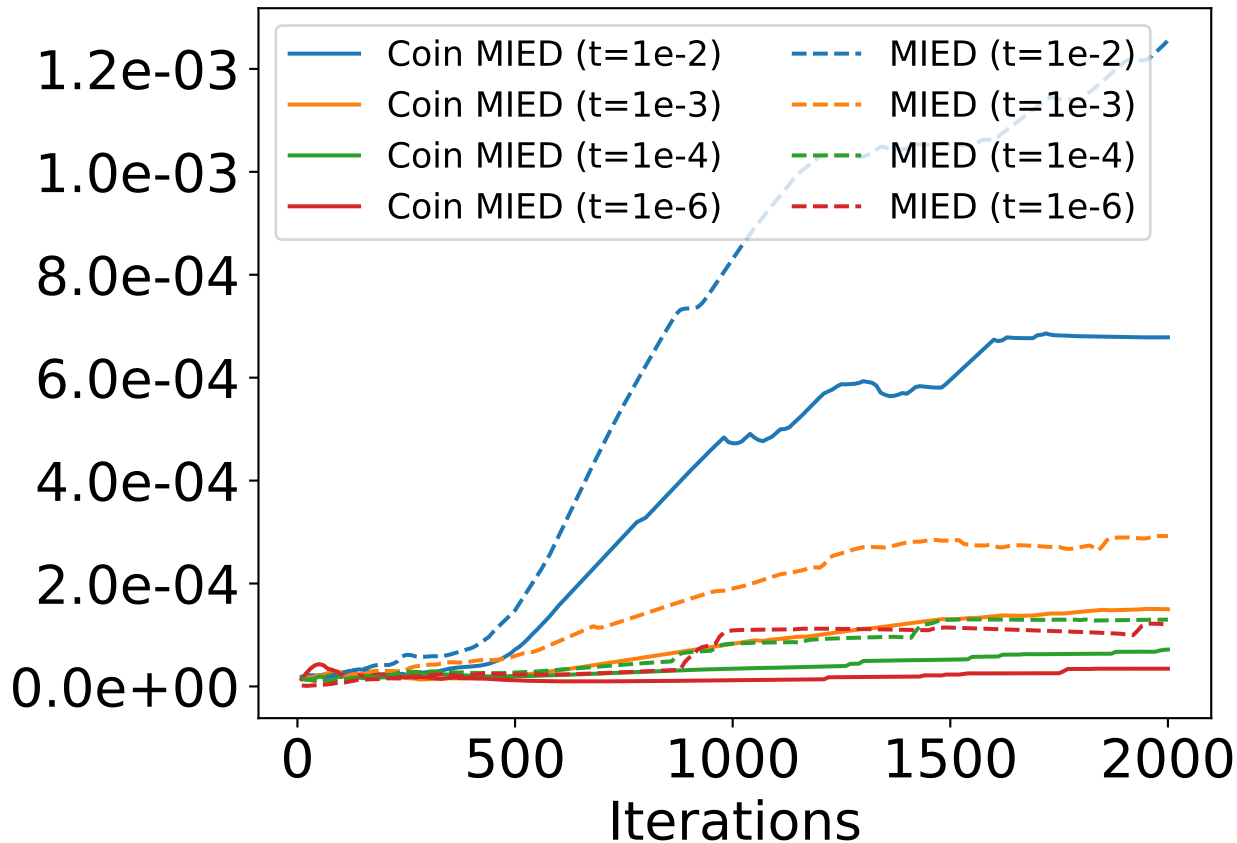

Supplement: supplementary_material [file attachment]

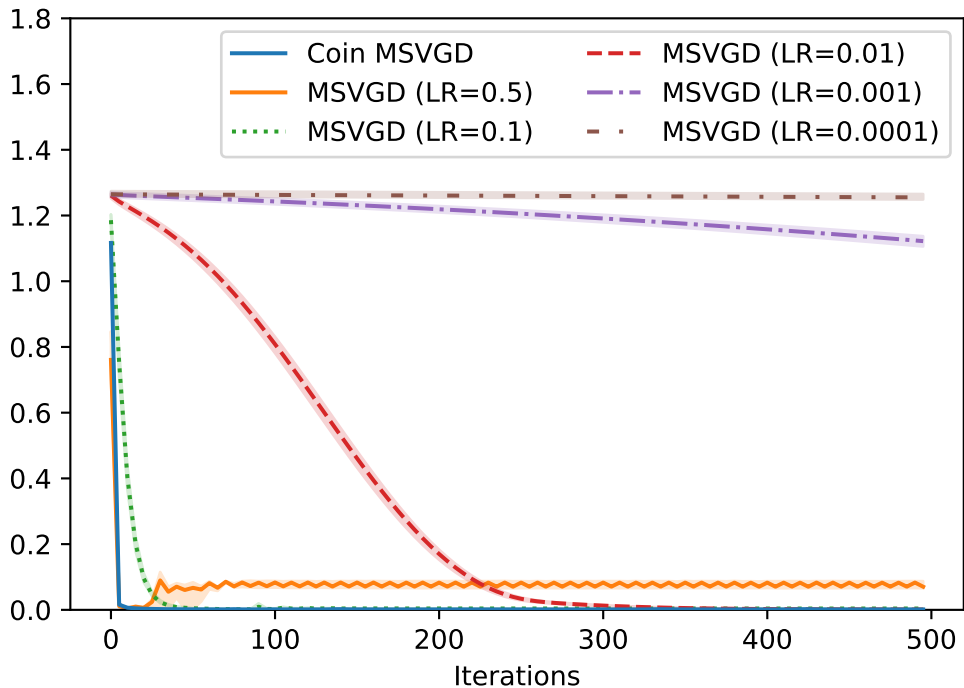

Supplement: supplementary_material [file attachment]

# Matrix SVGD (Mixture)

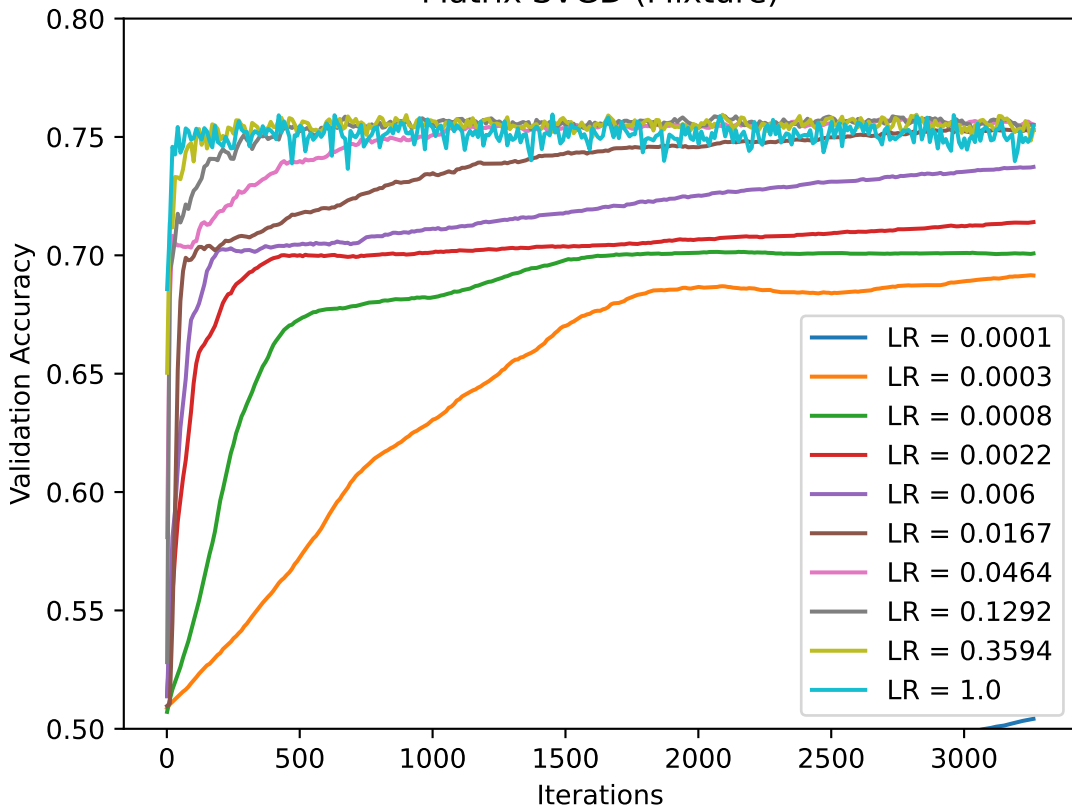

Supplement: supplementary_material [file attachment]

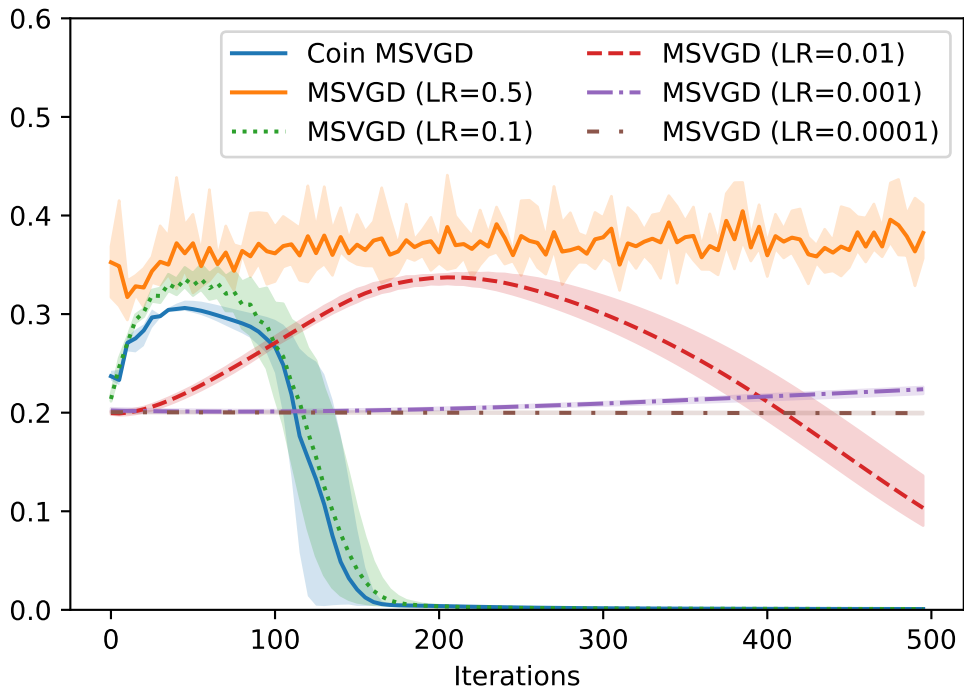

Supplement: supplementary_material [file attachment]

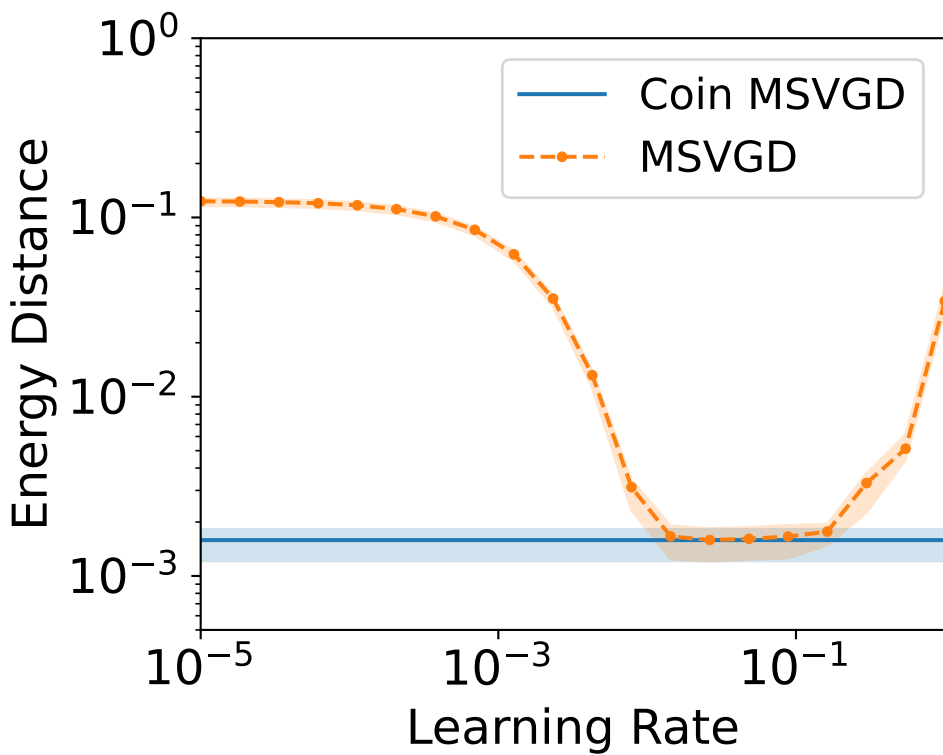

Supplement: supplementary_material [file attachment]

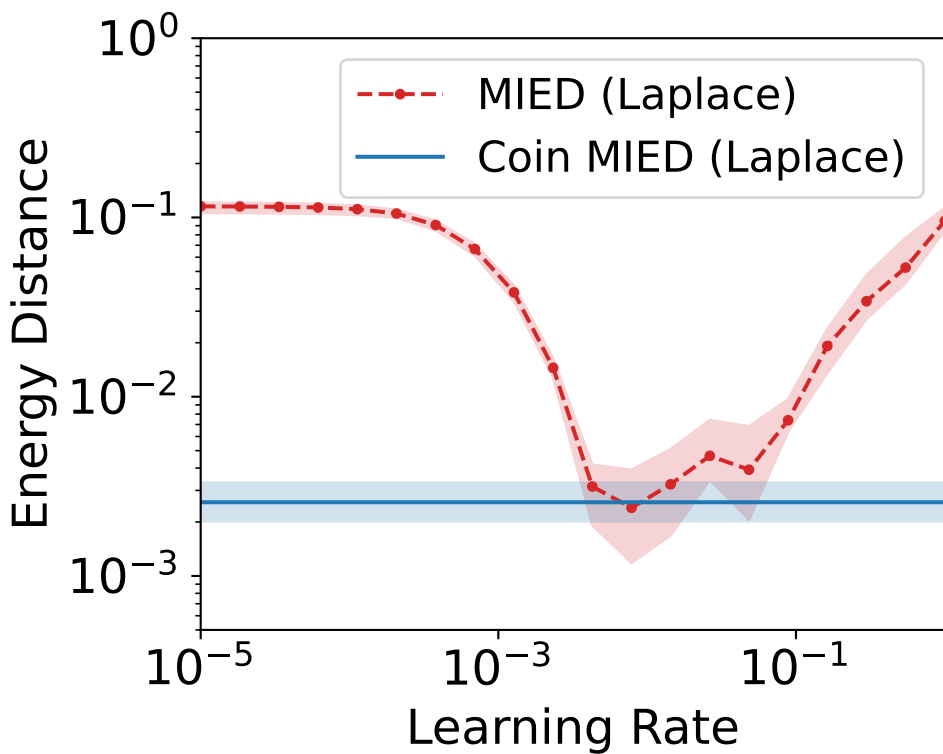

Supplement: supplementary_material [file attachment]

Test Log Likelihood

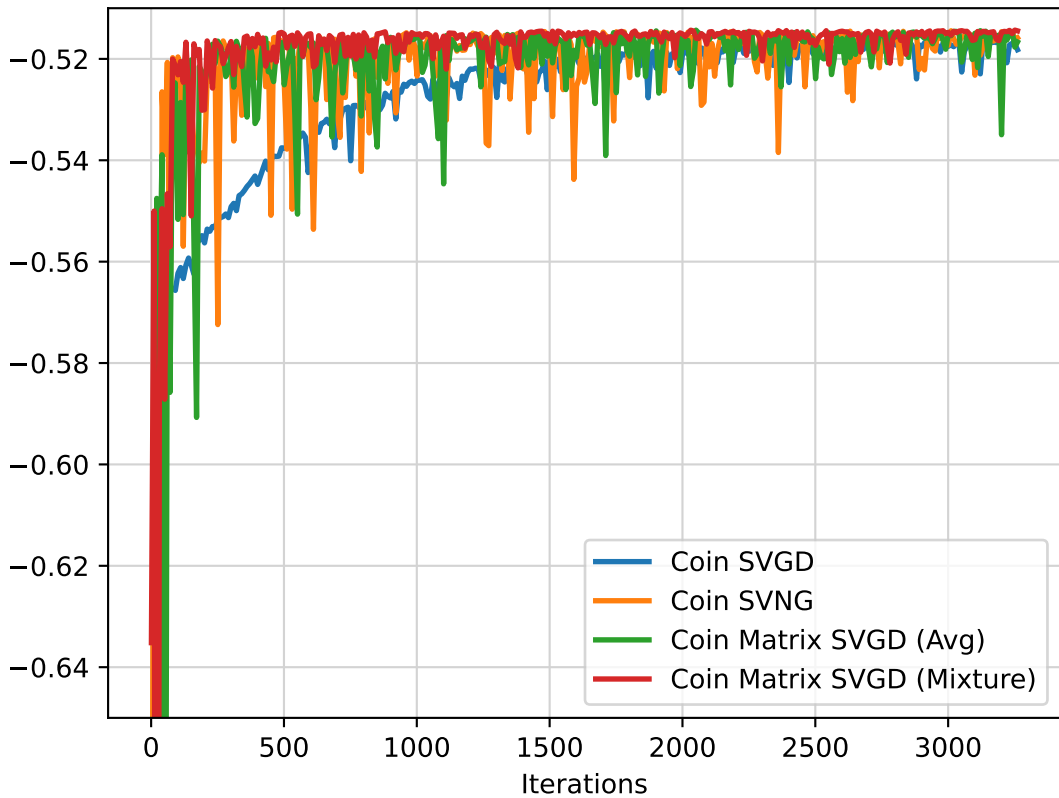

Supplement: supplementary_material [file attachment]

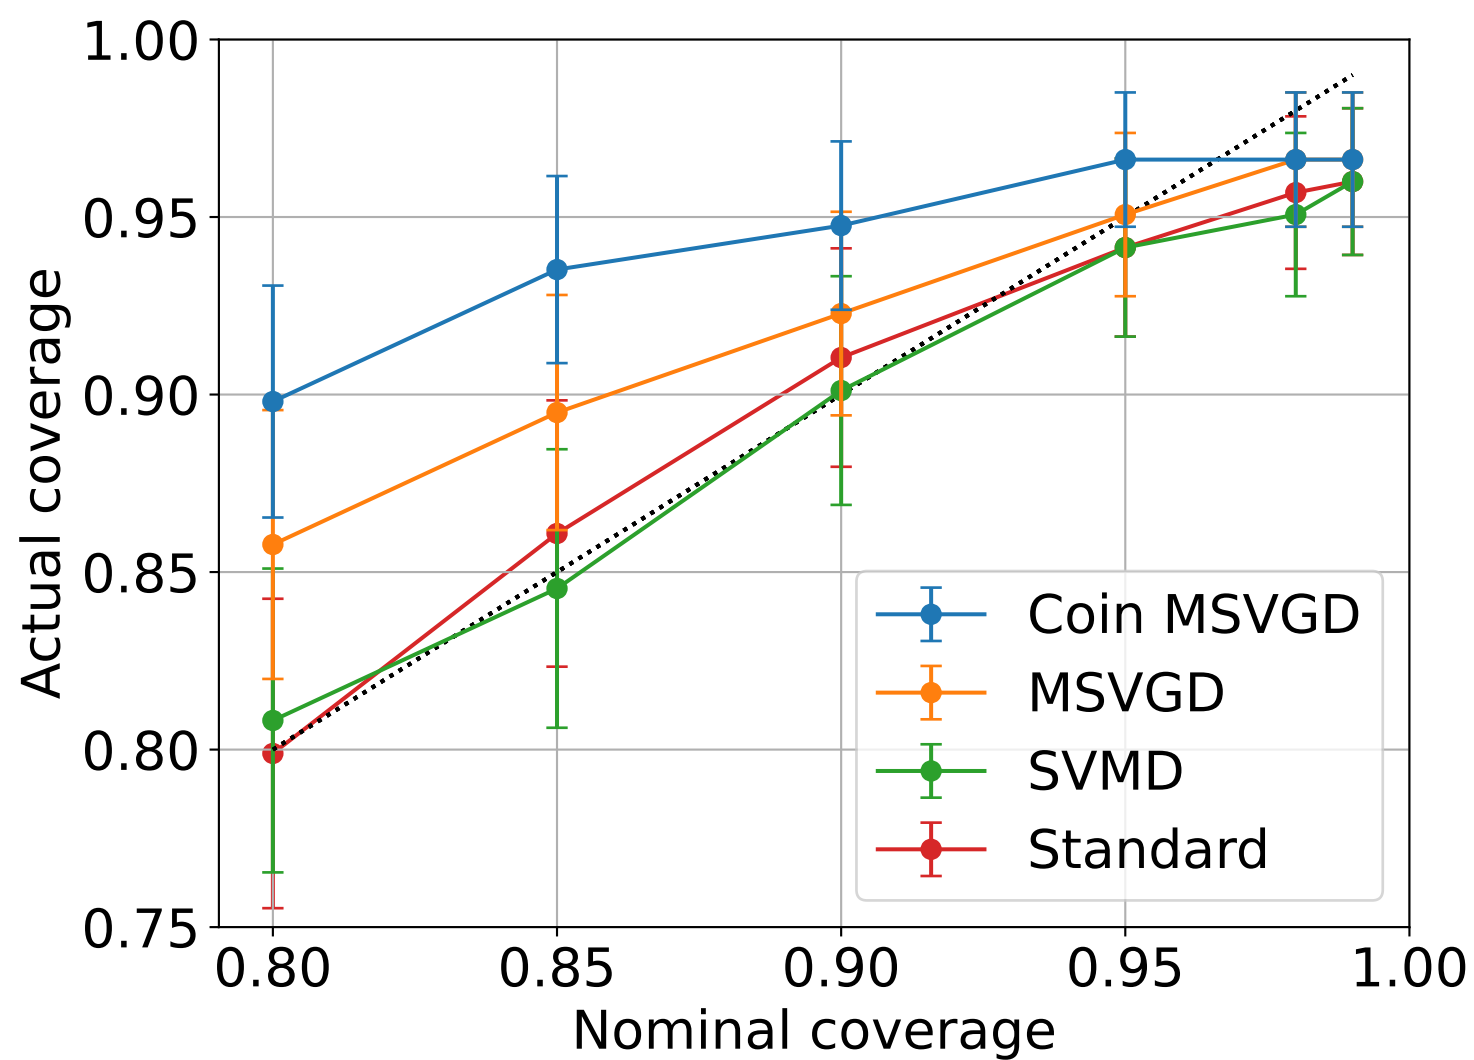

Supplement: supplementary_material [file attachment]

Matrix SVGD (Avg)

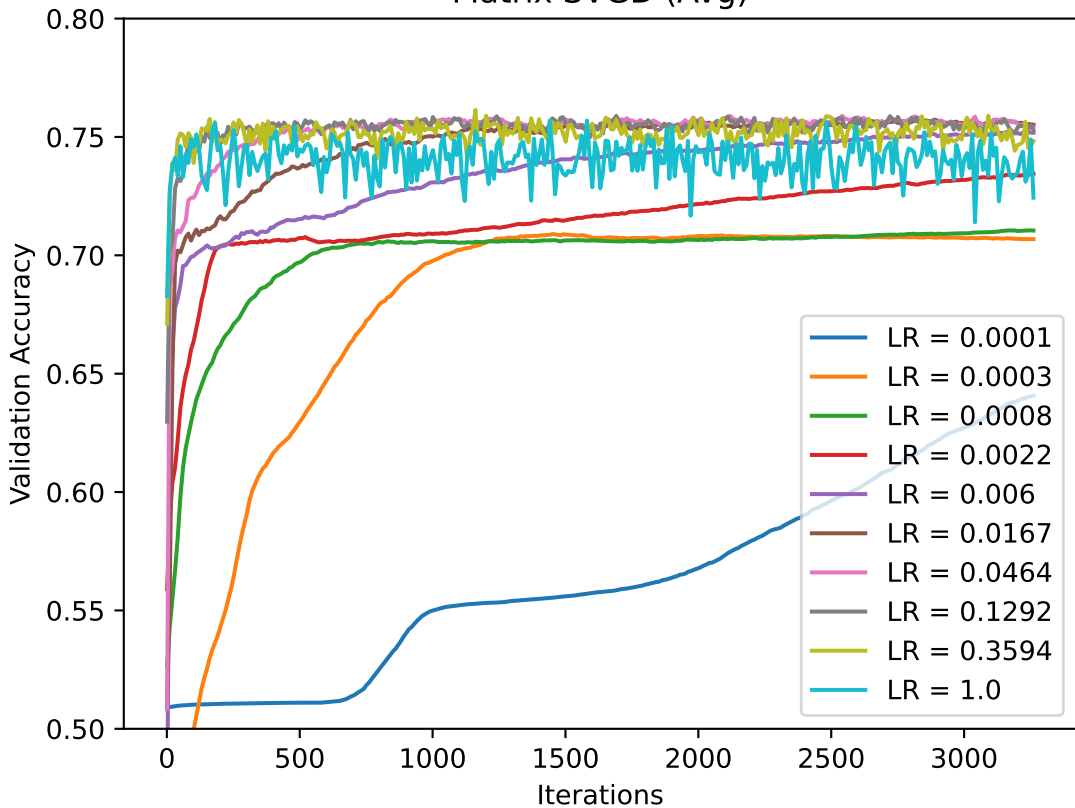

Supplement: supplementary_material [file attachment]

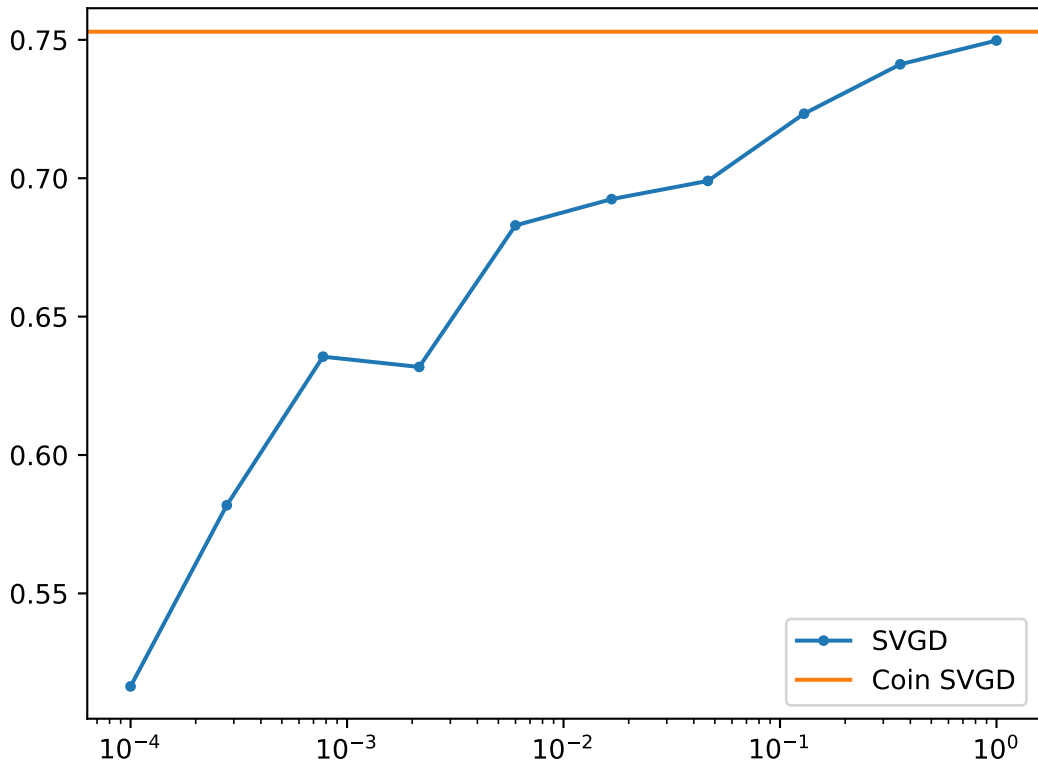

Supplement: supplementary_material [file attachment]

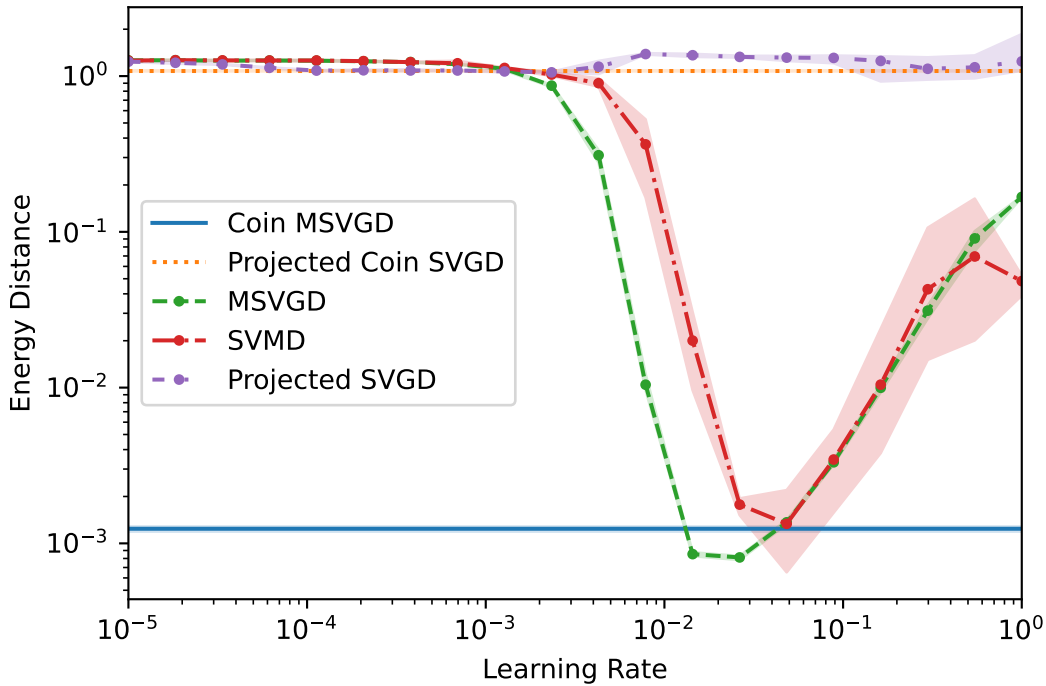

Supplement: supplementary_material [file attachment]

# SVGD

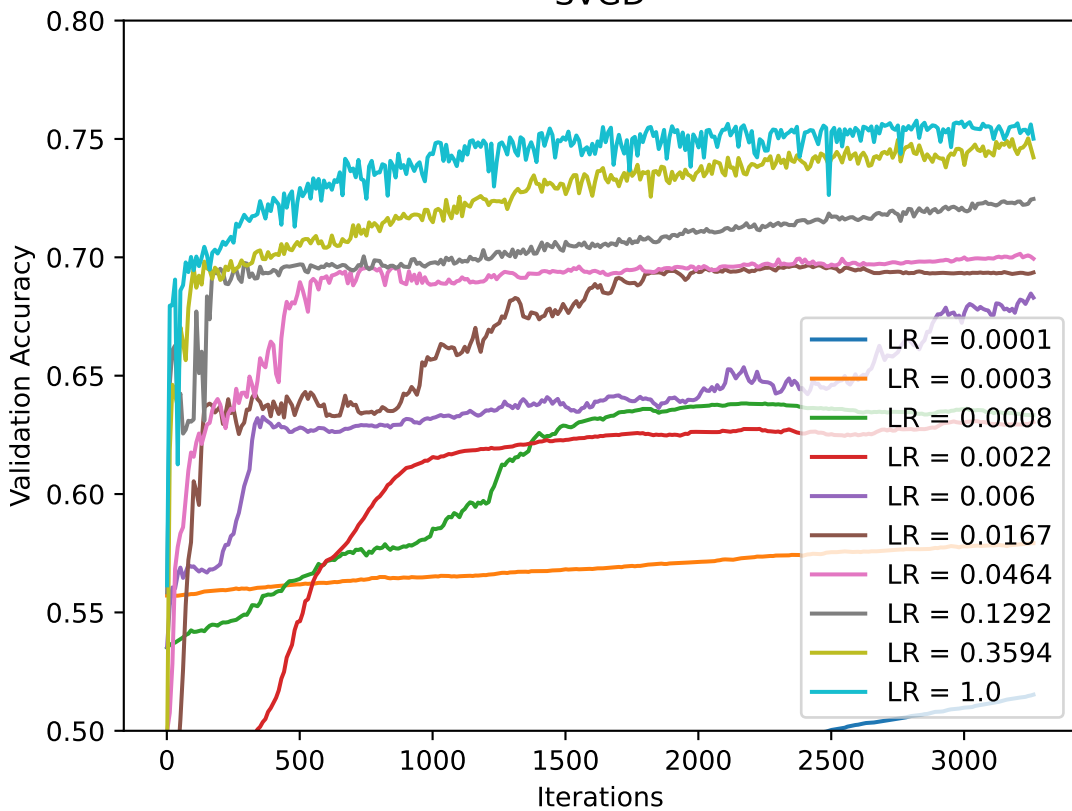

Supplement: supplementary_material [file attachment]

Coin SVNG

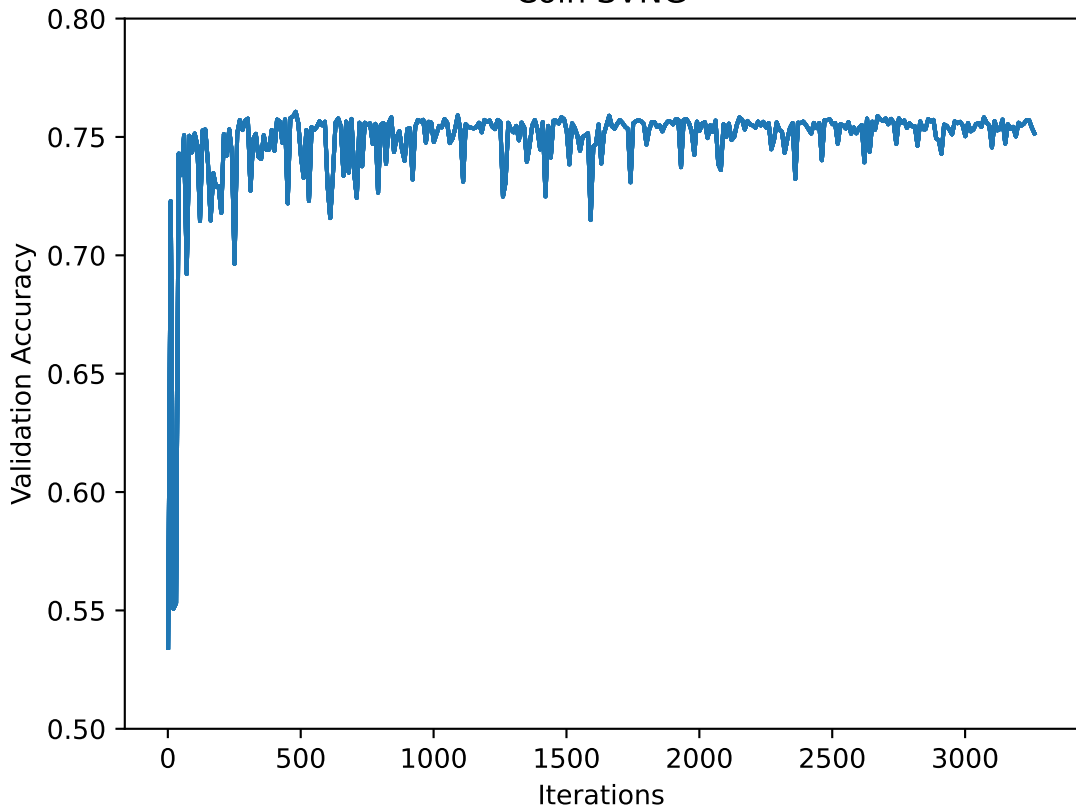

Supplement: supplementary_material [file attachment]

Coin SVGD

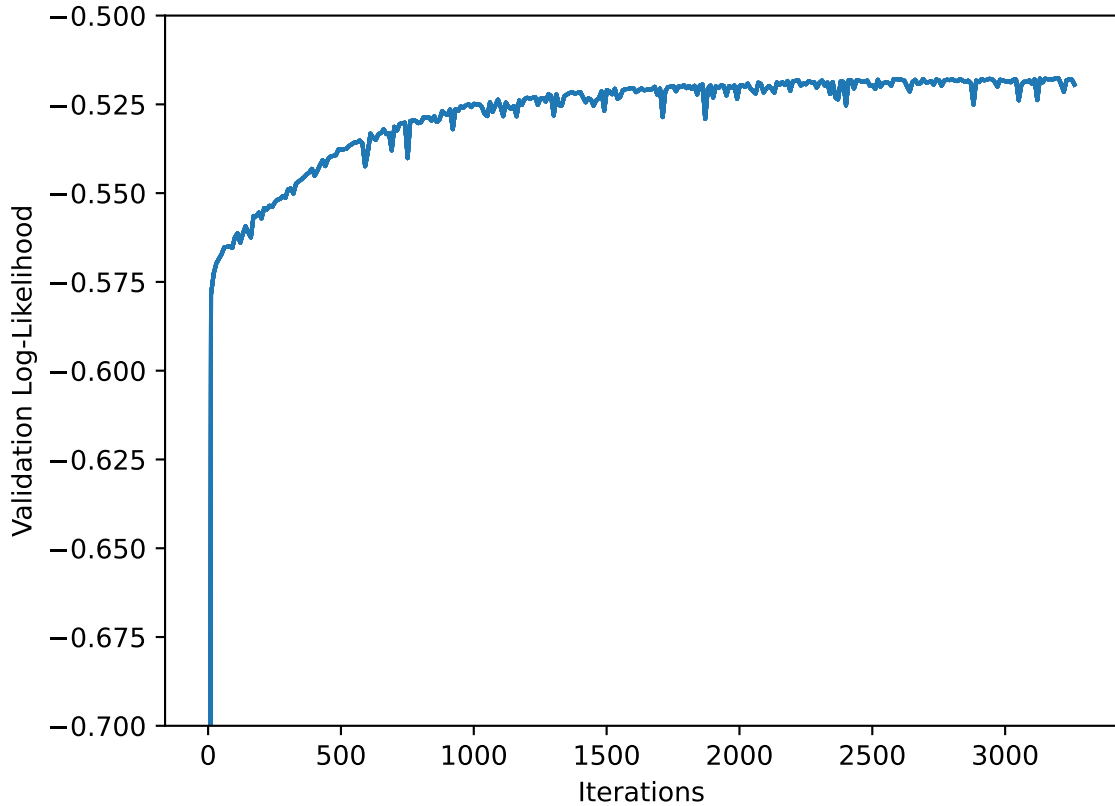

Supplement: supplementary_material [file attachment]

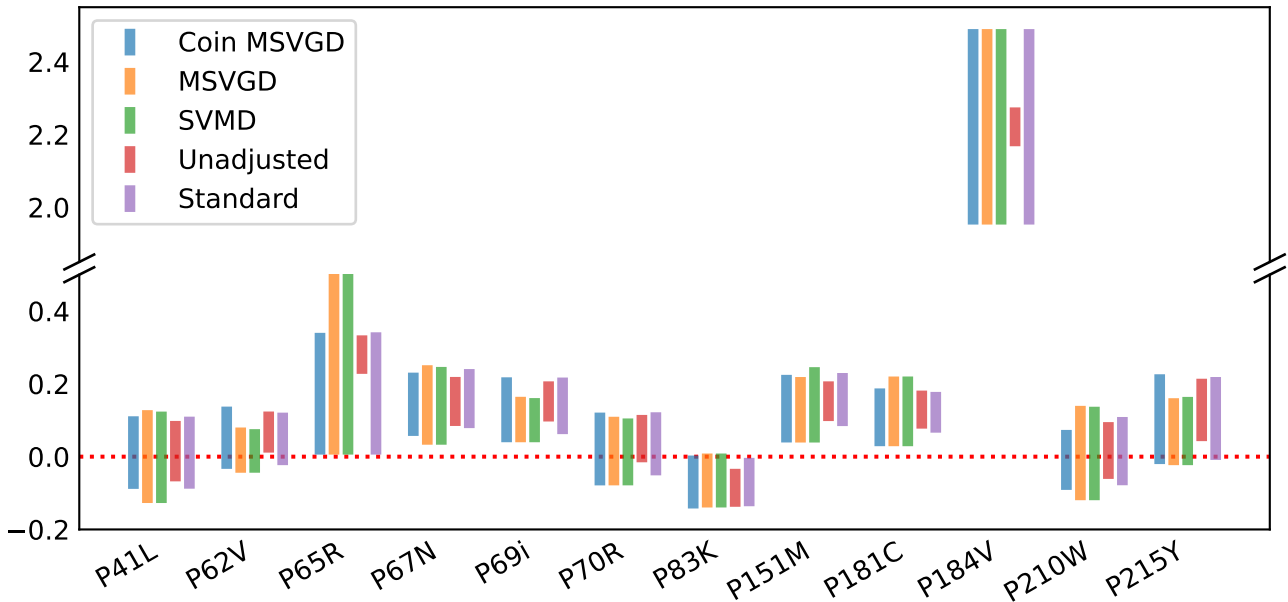

Supplement: supplementary_material [file attachment]

# SVGD

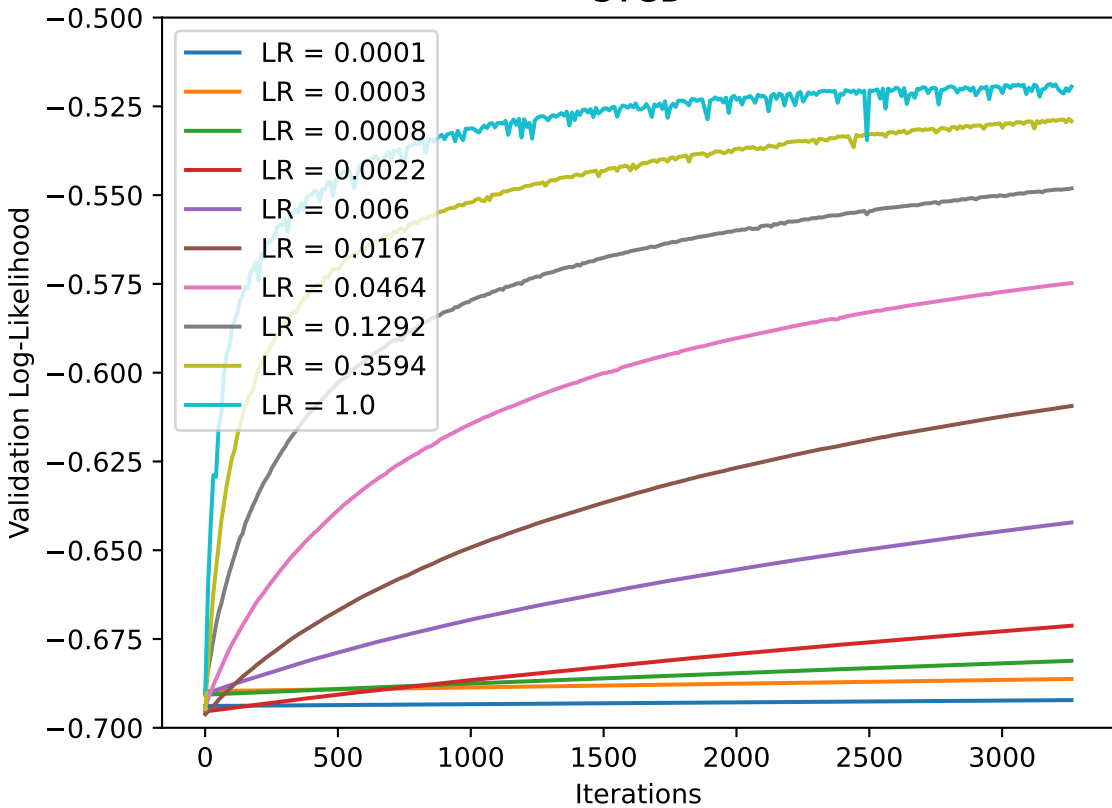

Supplement: supplementary_material [file attachment]

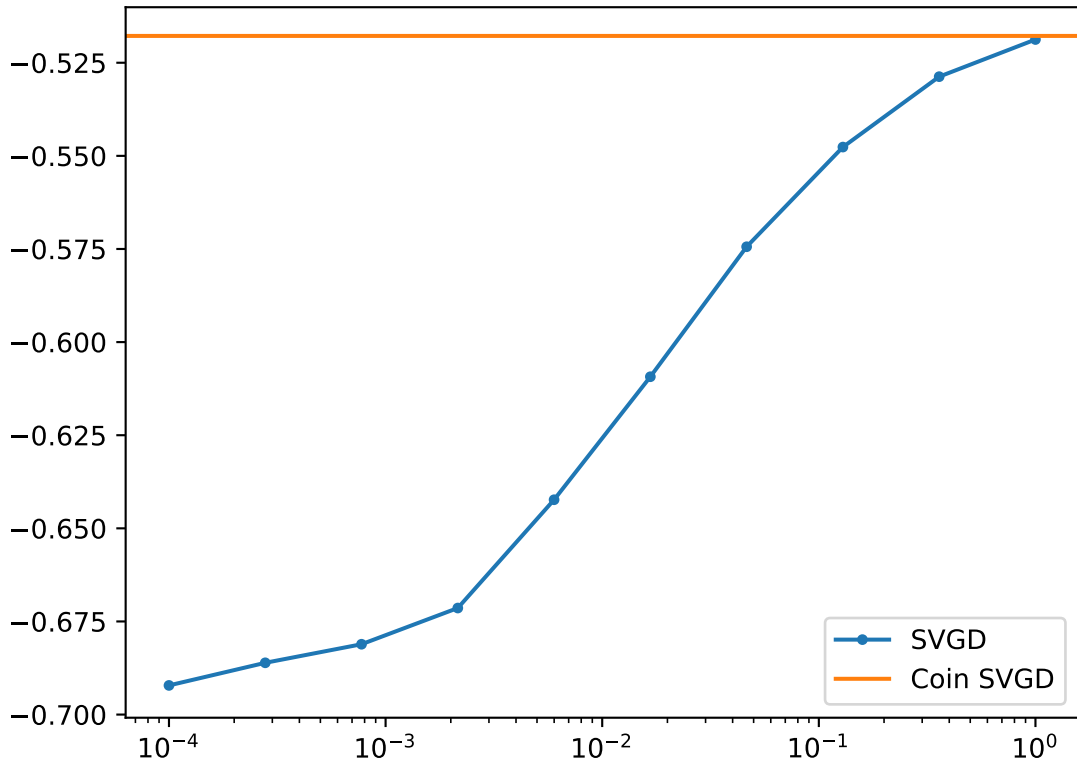

Supplement: supplementary_material [file attachment]

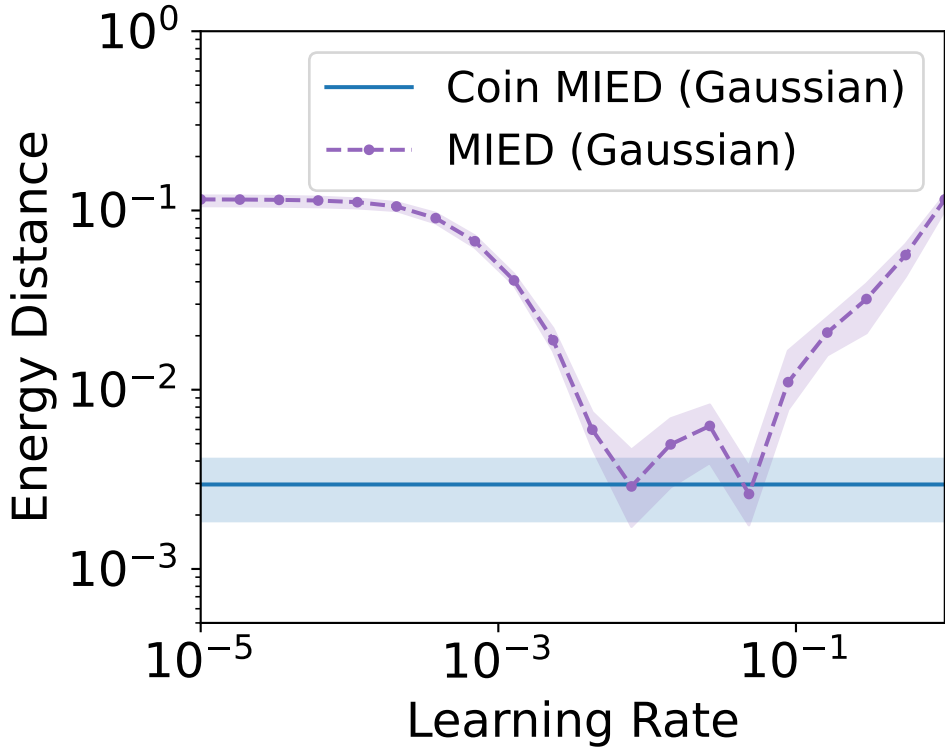

Supplement: supplementary_material [file attachment]

## SVNG

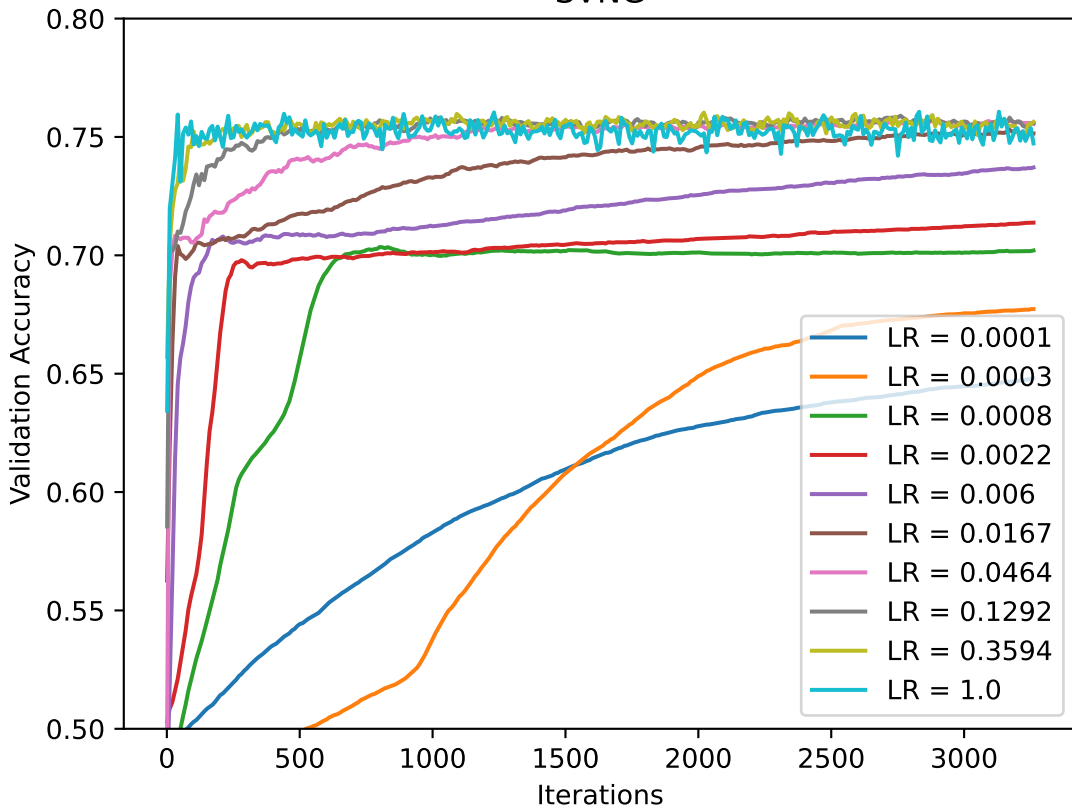

Supplement: supplementary_material [file attachment]

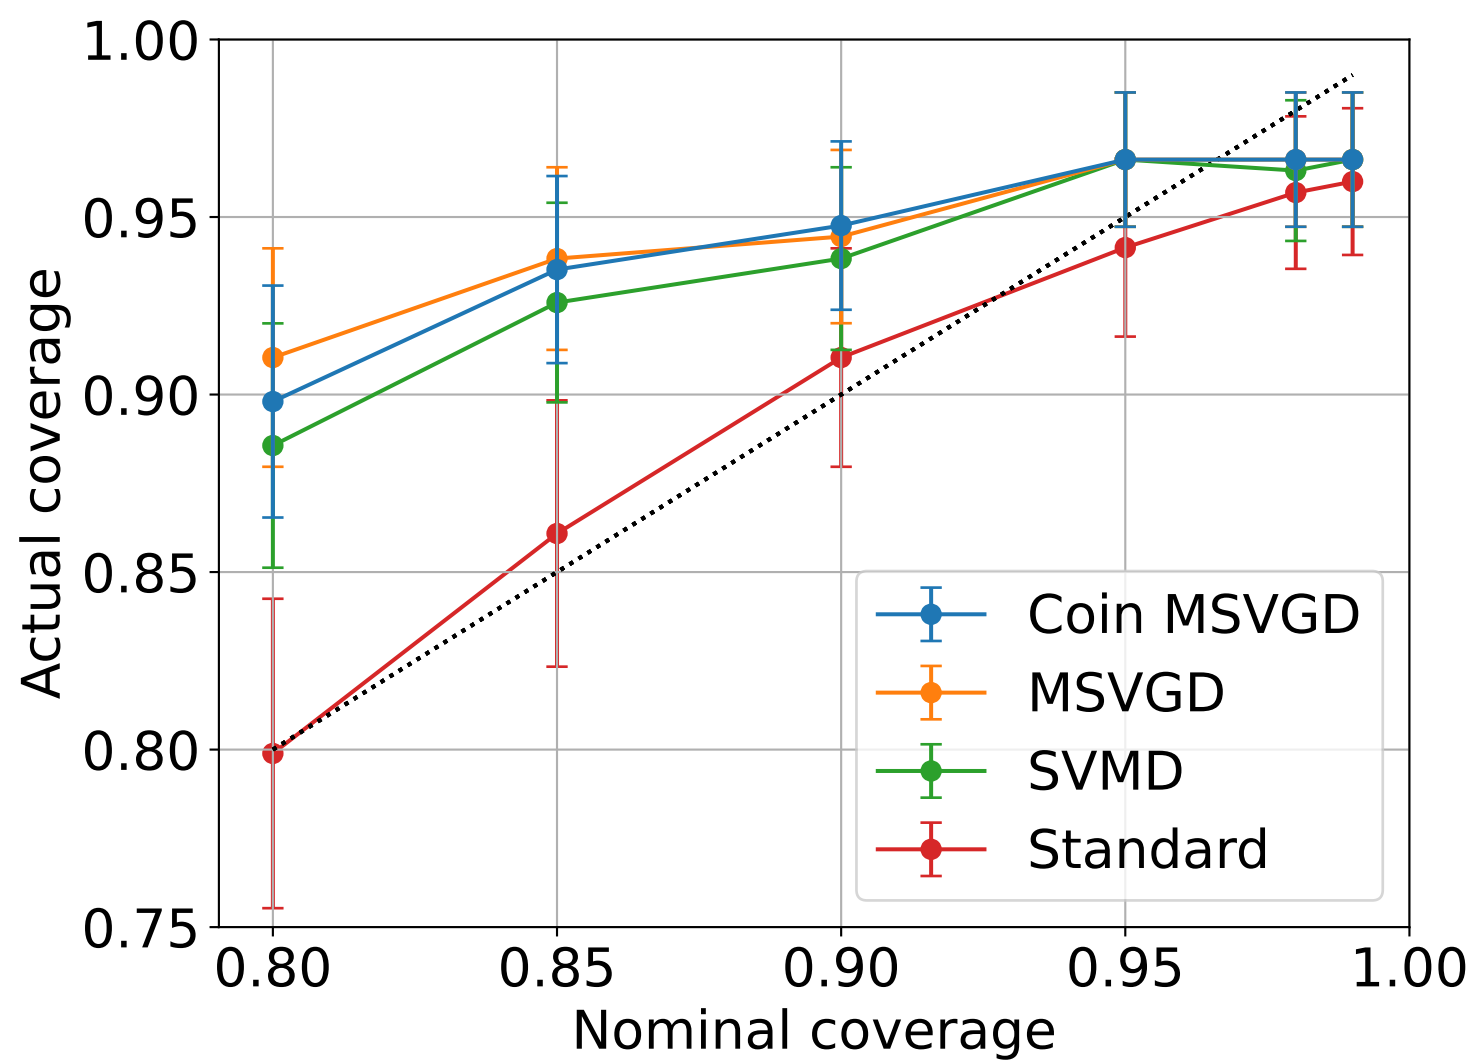

Supplement: supplementary_material [file attachment]

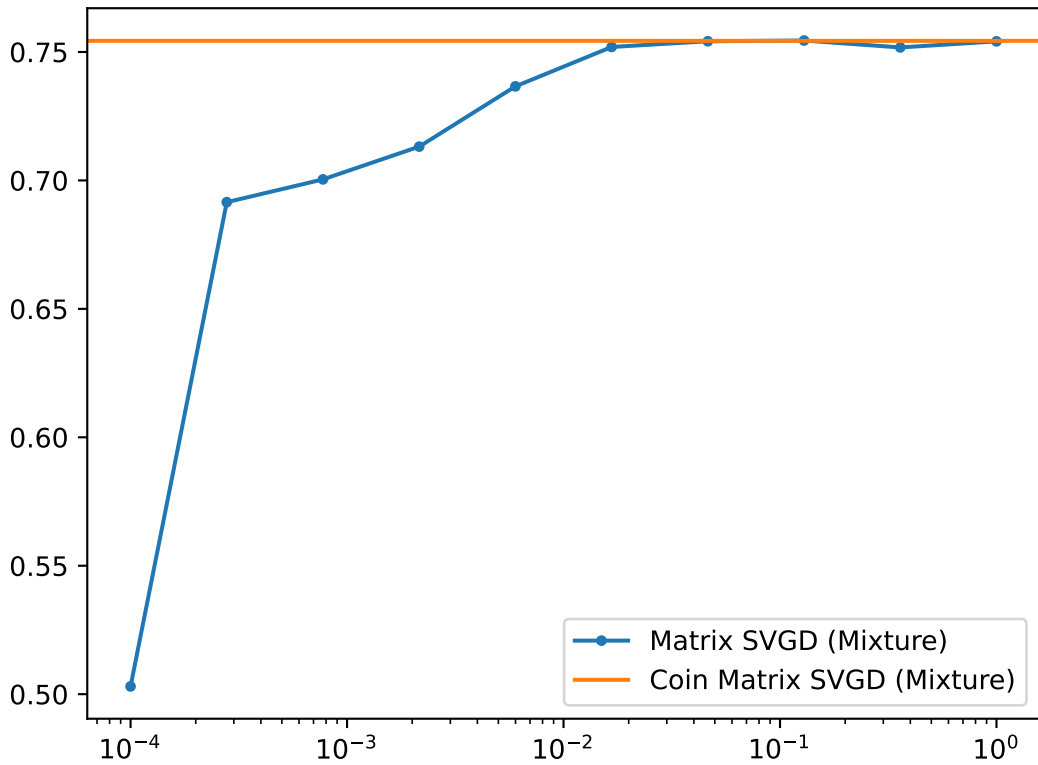

Supplement: supplementary_material [file attachment]

# Matrix SVGD (Mixture)

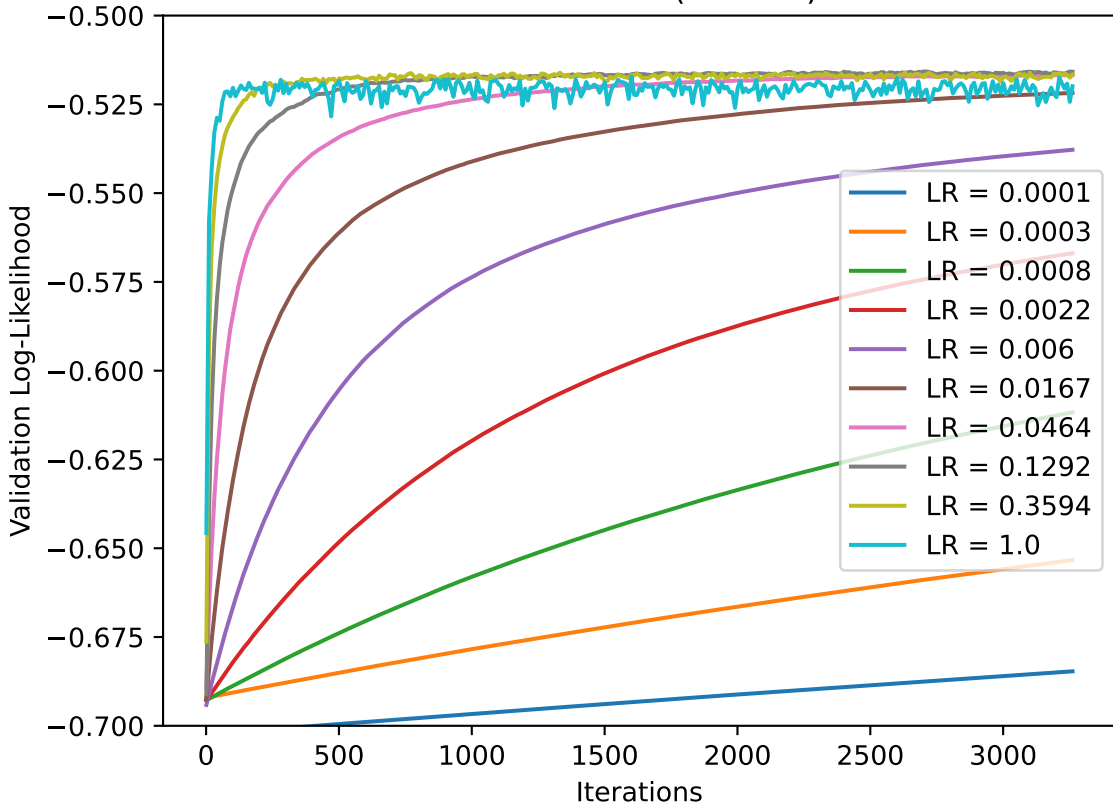

Supplement: supplementary_material [file attachment]

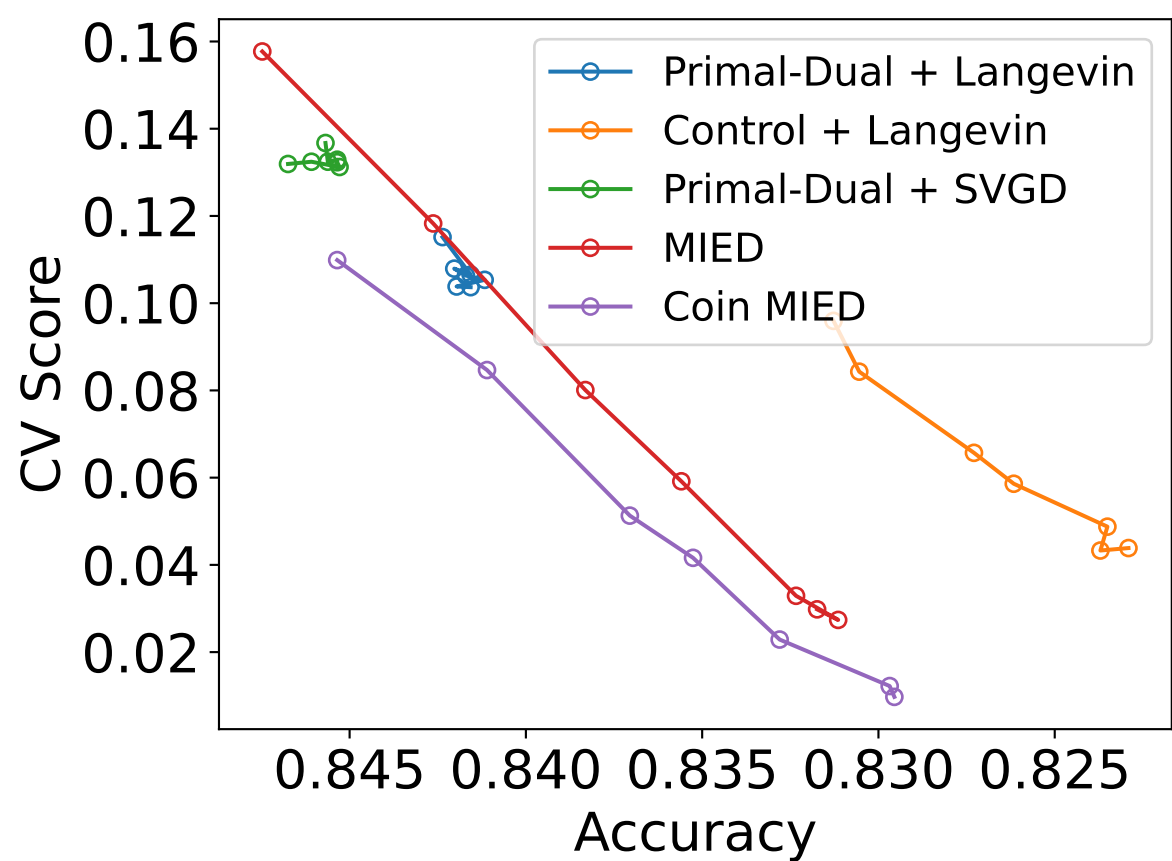

Supplement: supplementary_material [file attachment]

# RSVGD

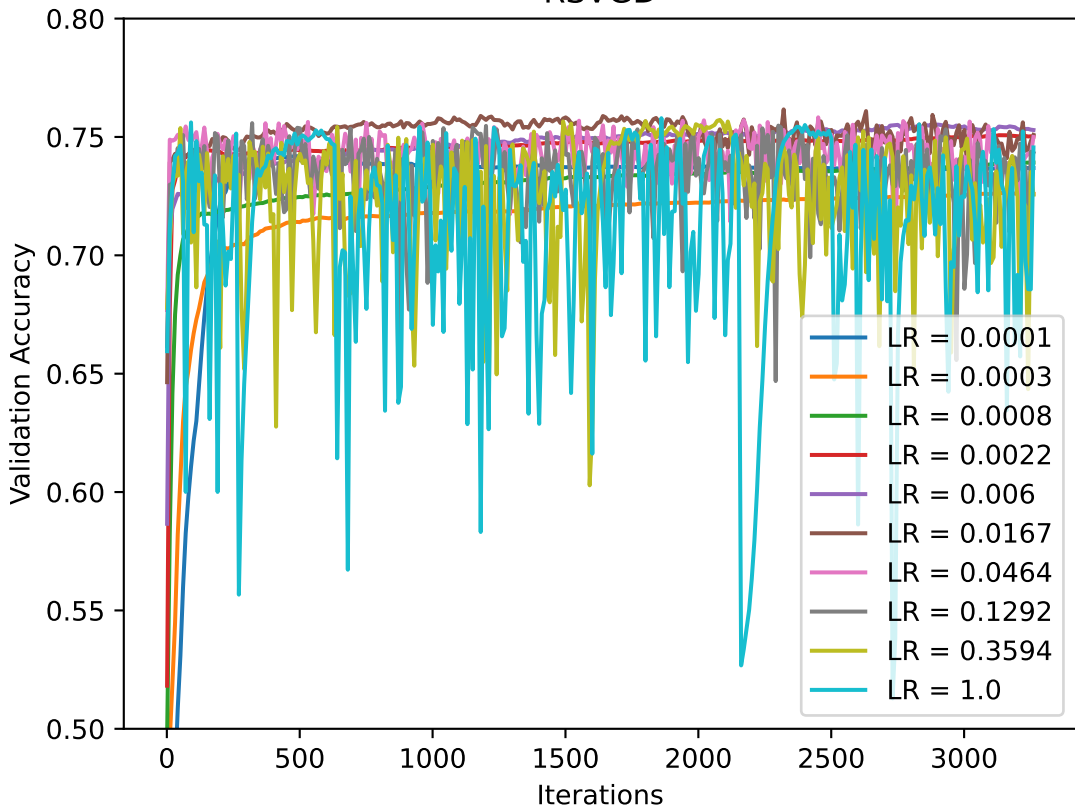

Supplement: supplementary_material [file attachment]

Matrix SVGD (Avg)

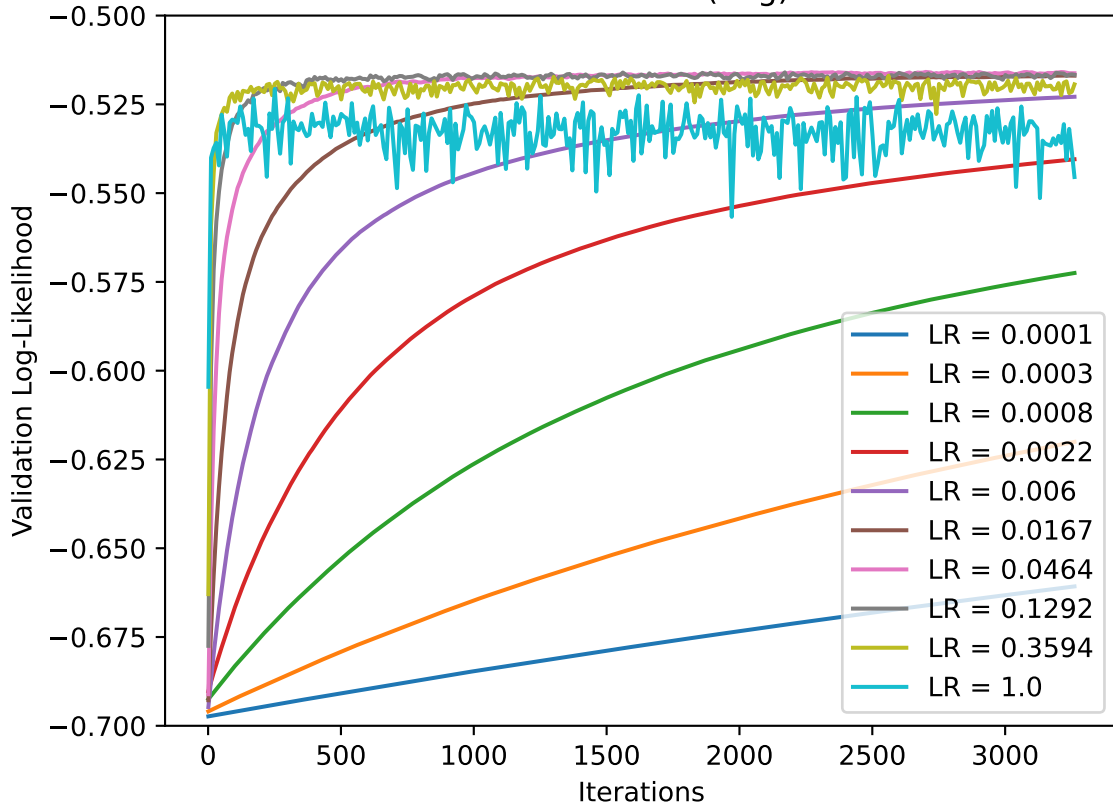

Supplement: supplementary_material [file attachment]

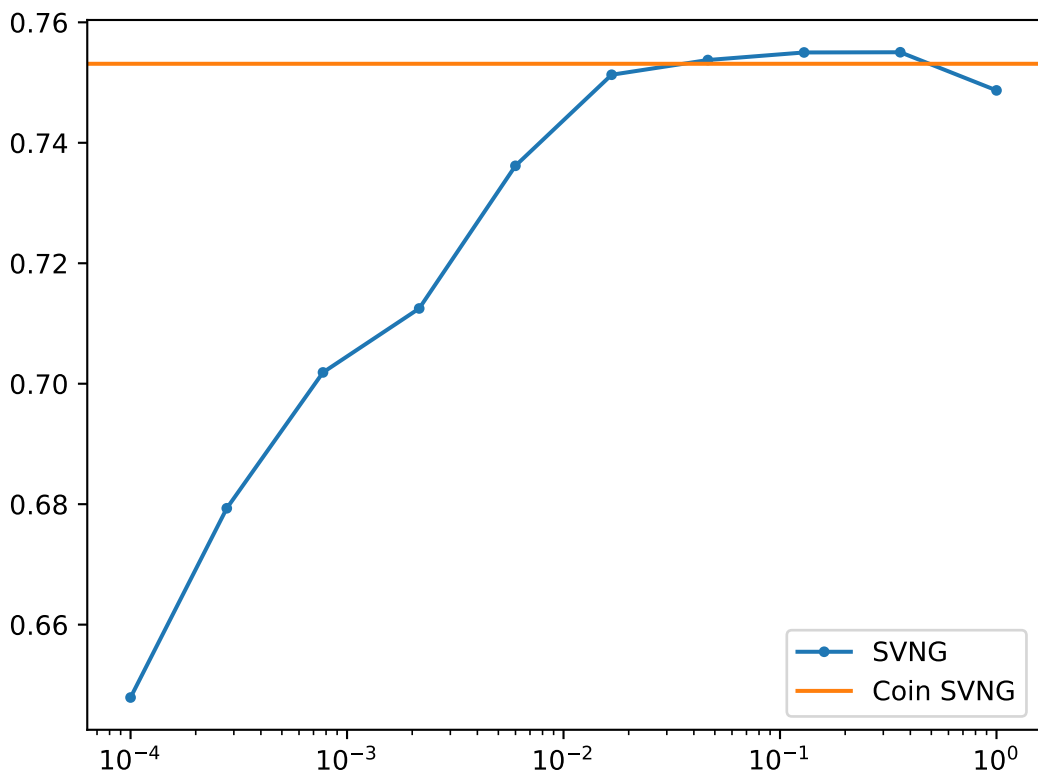

Supplement: supplementary_material [file attachment]

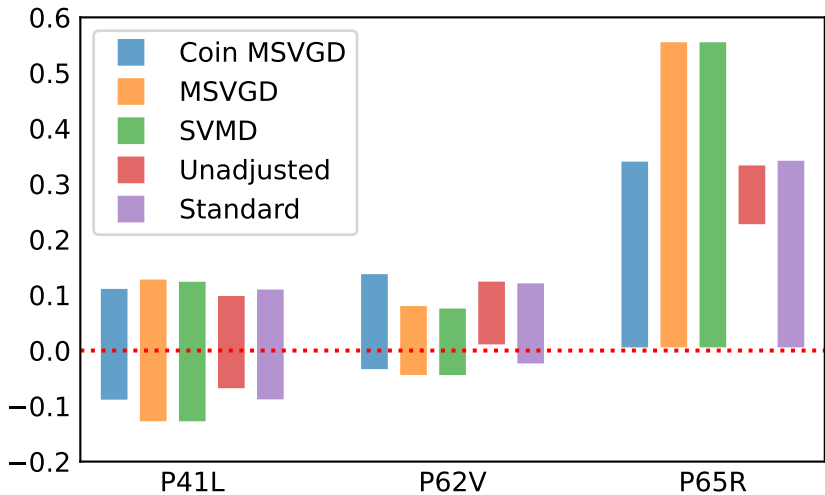

Supplement: supplementary_material [file attachment]

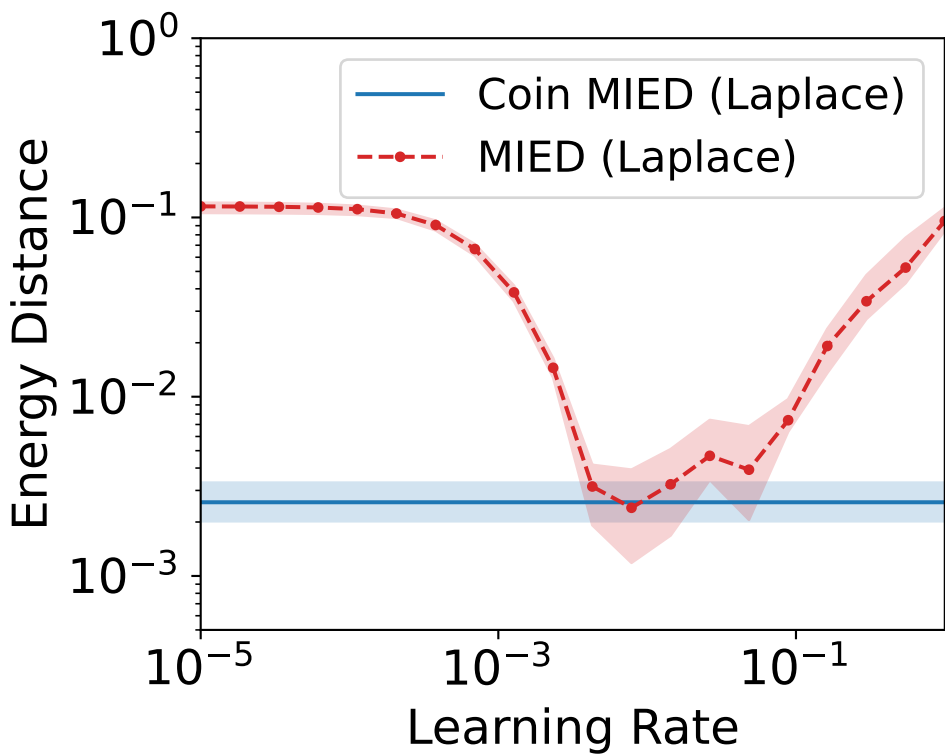

Supplement: supplementary_material [file attachment]

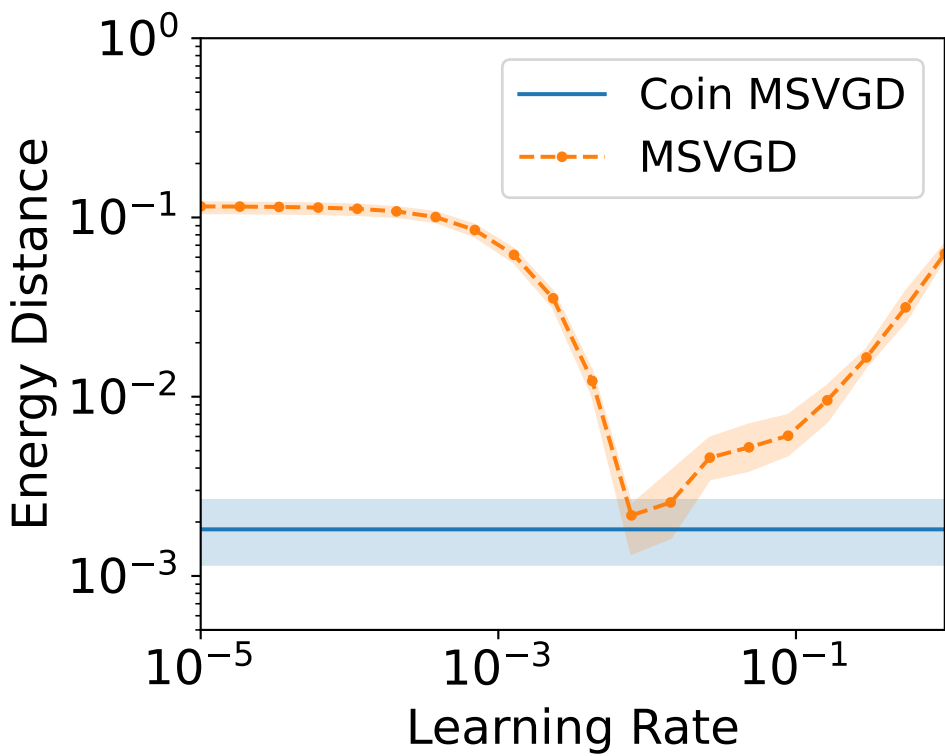

Supplement: supplementary_material [file attachment]

Energy Distance

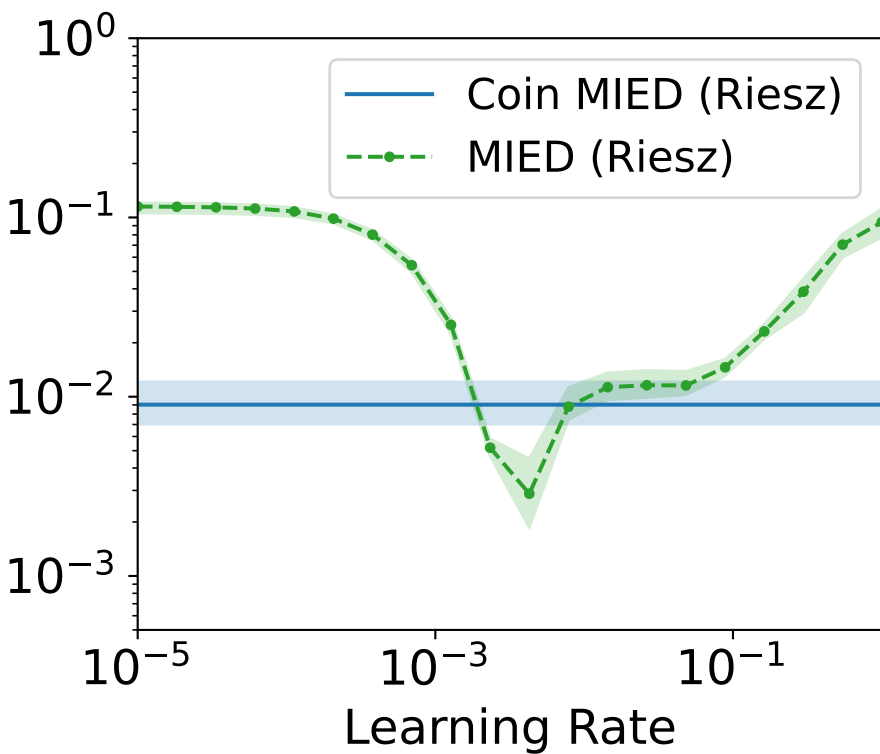

Supplement: supplementary_material [file attachment]

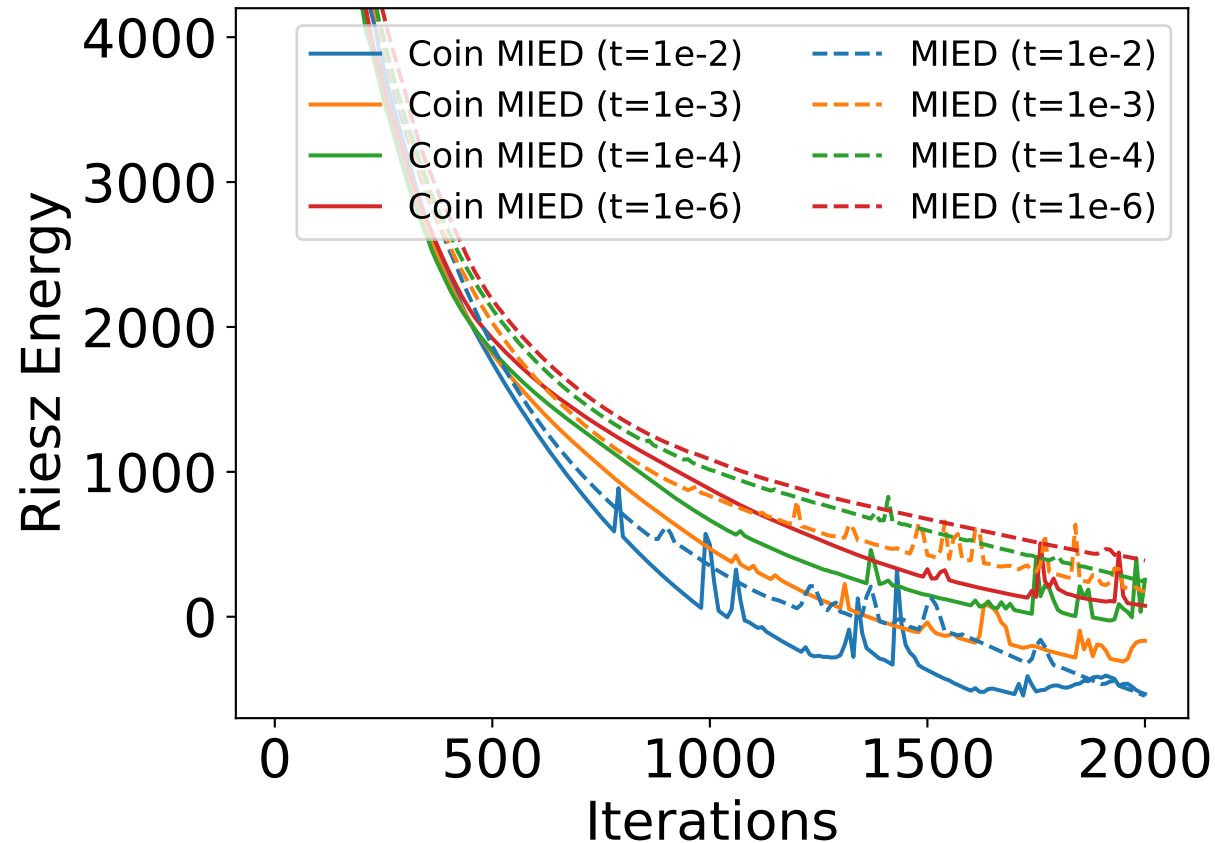

Supplement: supplementary_material [file attachment]

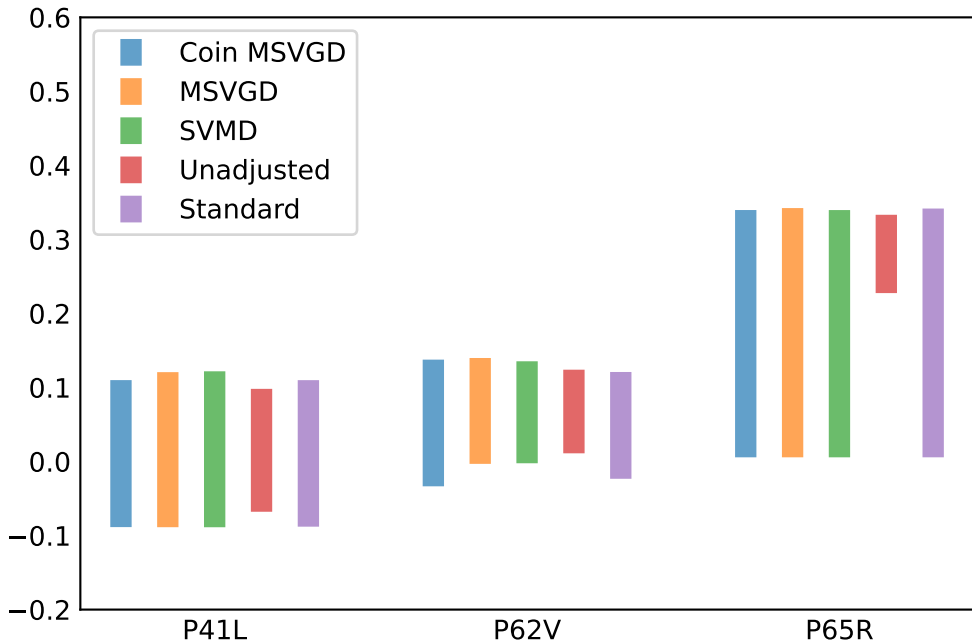

Supplement: supplementary_material [file attachment]

Coin SVGD

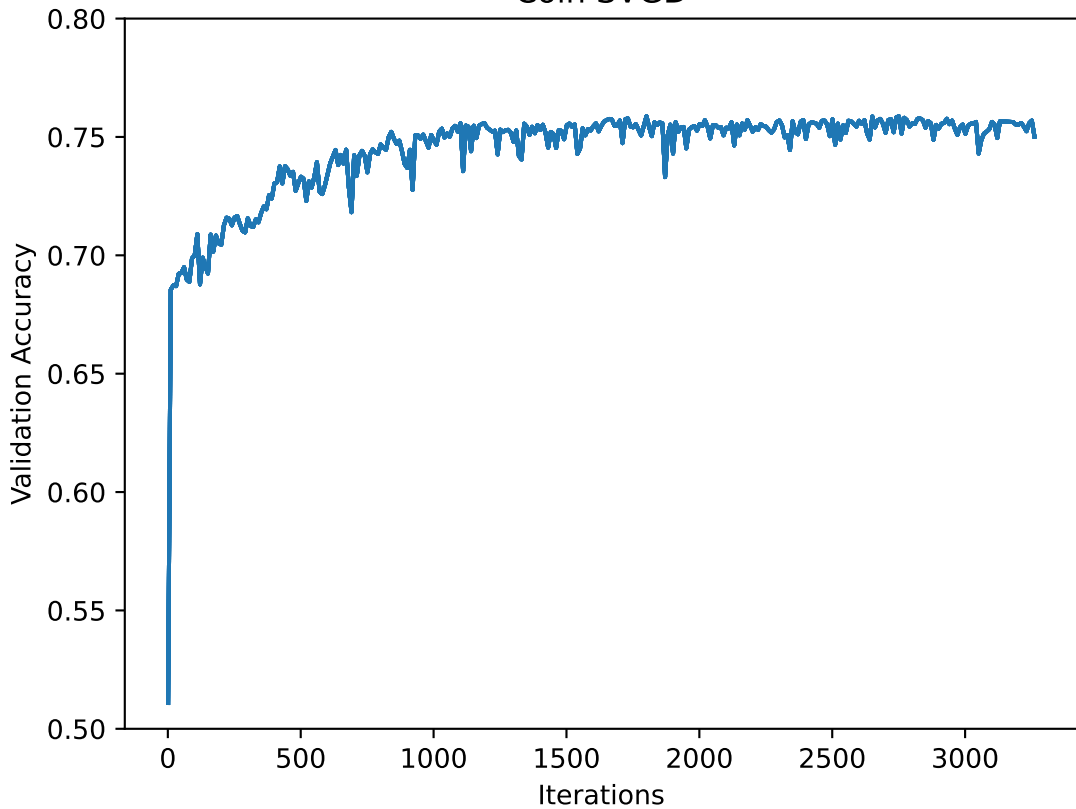

Supplement: supplementary_material [file attachment]

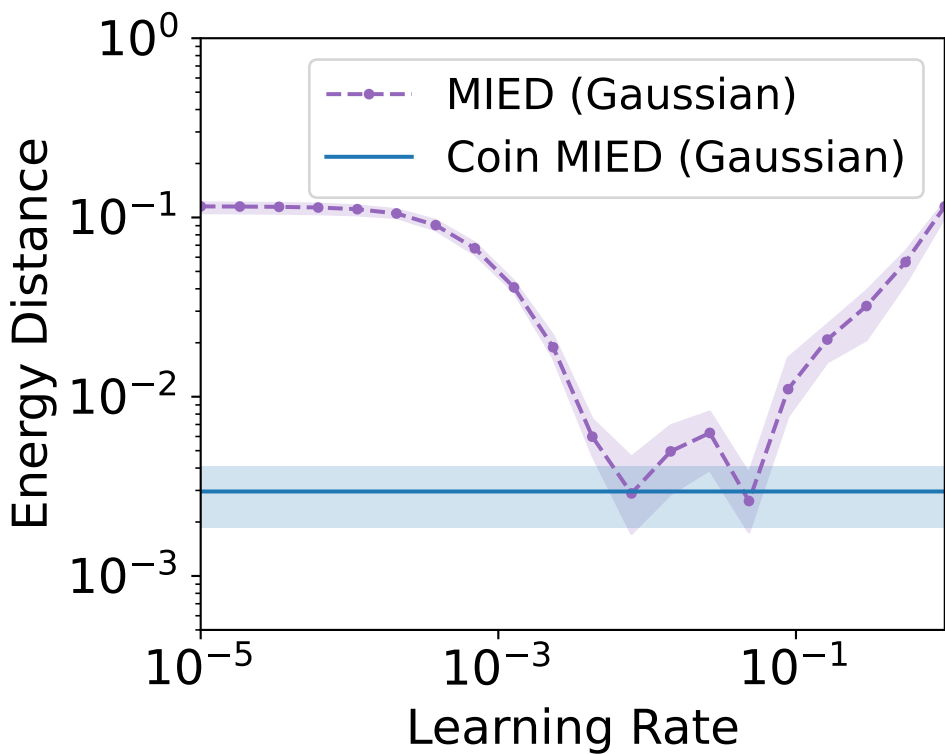

Supplement: supplementary_material [file attachment]

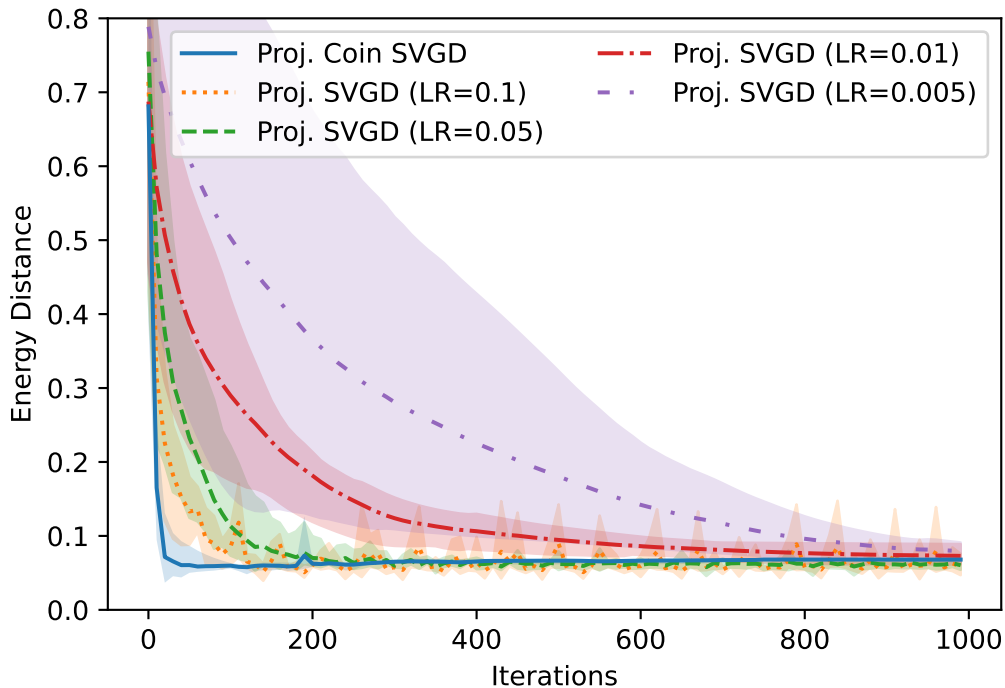

Supplement: supplementary_material [file attachment]

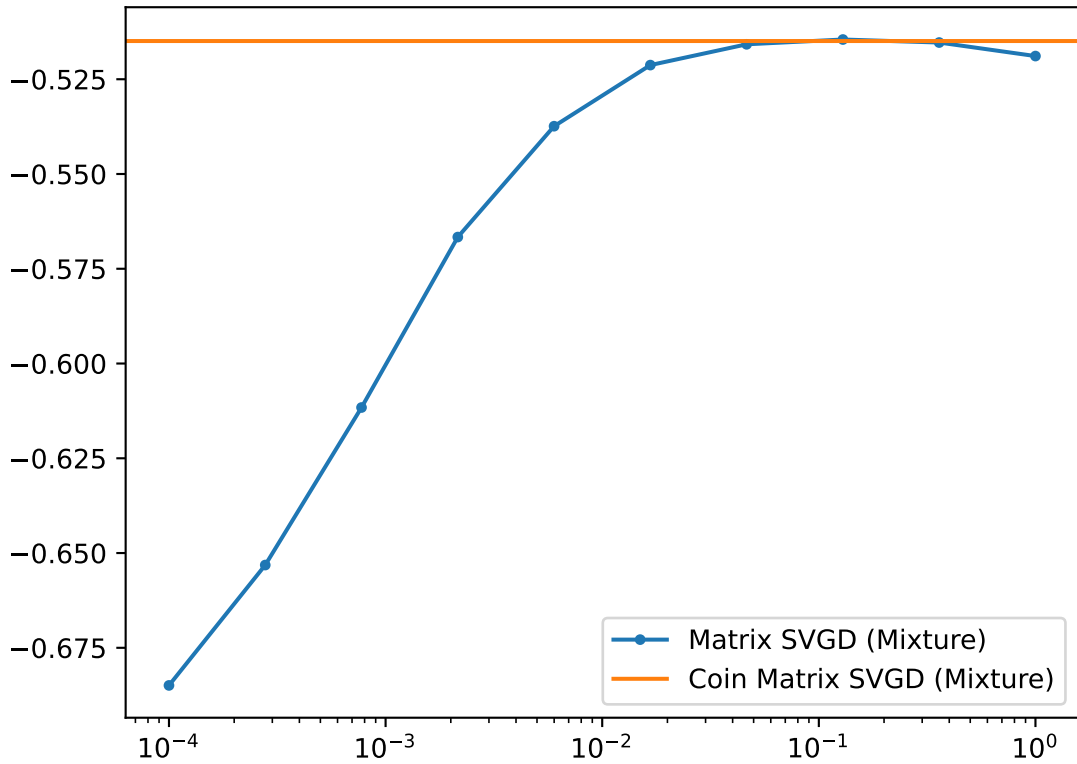

Supplement: supplementary_material [file attachment]

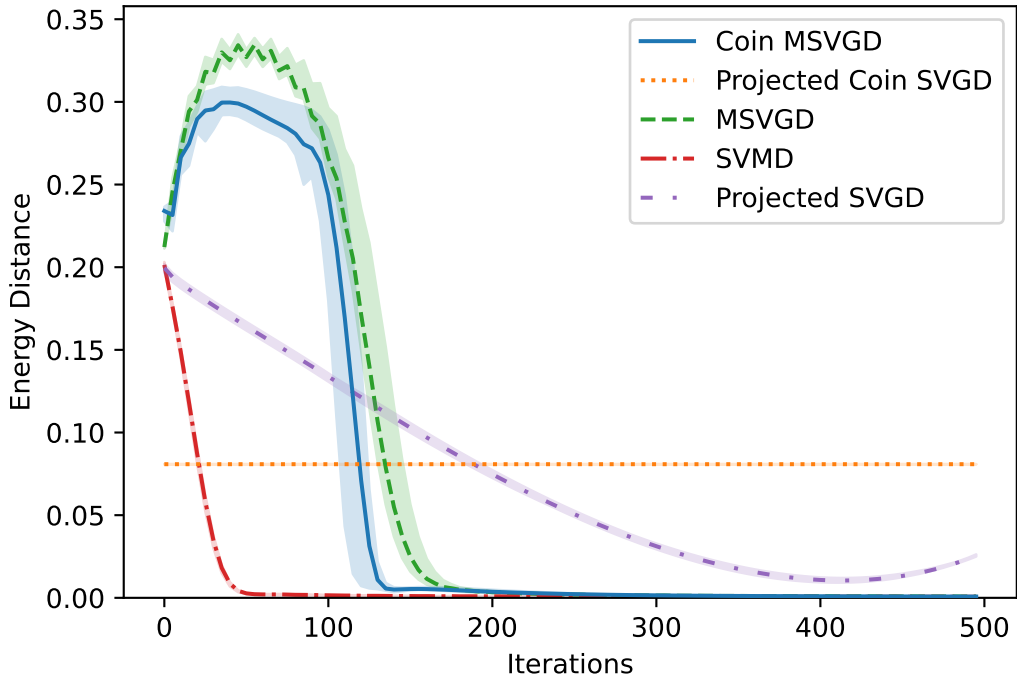

Supplement: supplementary_material [file attachment]

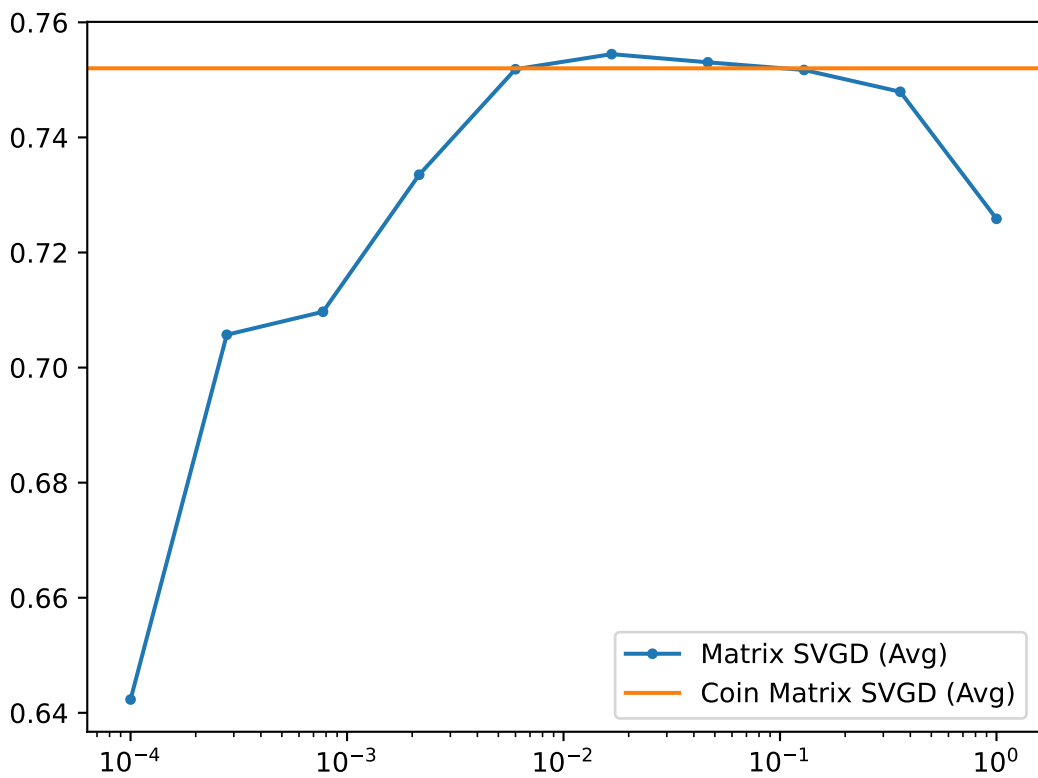

Supplement: supplementary_material [file attachment]

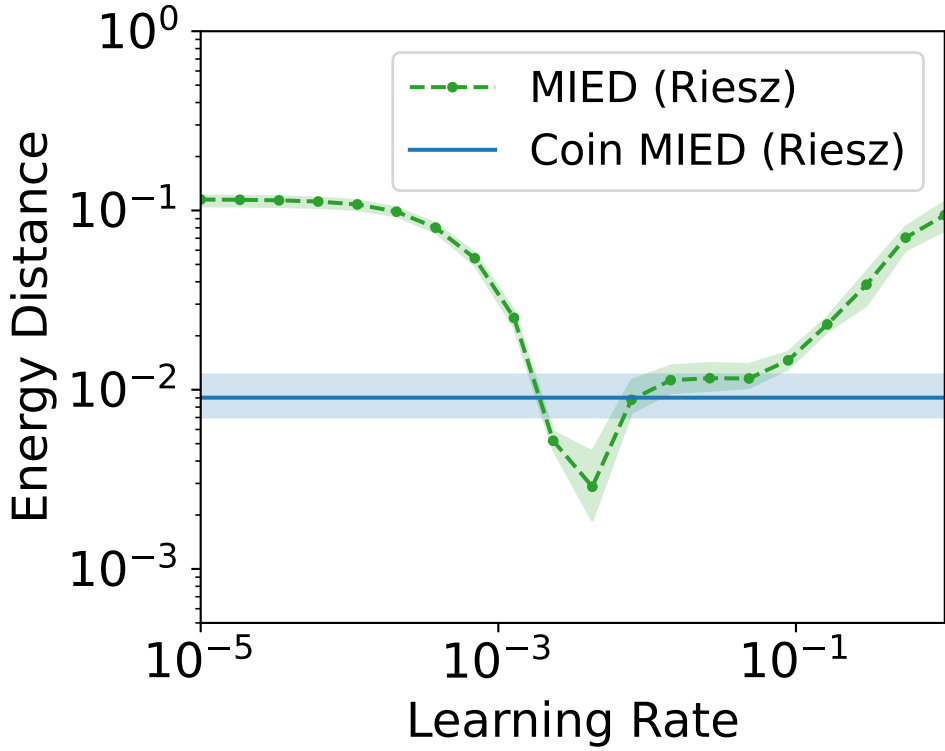

Supplement: supplementary_material [file attachment]
